# Supplementary material for: Sn and Ge Complexes with Redox-Active Ligands as Efficient Interfacial Membrane-like Buffer Layers for p-i-n Perovskite Solar Cells
Source: MDPI journal article supplement (doi:10.3390/membranes13040439), 2023-04-17
Supplement: s1 [file s1]

## Supporting Information

### Sn and Ge complexes with redox-active ligands as efficient interfacial membrane-like buffer layers for p-i-n perovskite solar cells

Azat F. Akbulatov<sup>1</sup>, Anna Ya. Akyeva<sup>2</sup>, Pavel G. Shangin<sup>2</sup>, Nikita A. Emelianov<sup>1</sup>, Irina V. Krylova<sup>2</sup>, Mariya O. Markova<sup>2,3</sup>, Liliya D. Labutskaya<sup>2,4</sup>, Alexander V. Mumyatov<sup>1</sup>, Egor I. Tuzharov<sup>2</sup>, Dmitry A. Bunin<sup>5</sup>, Lyubov A. Frolova<sup>1</sup>, Mikhail P. Egorov<sup>2</sup>, Mikhail A. Syroeshkin<sup>2</sup>, and Pavel A. Troshin<sup>1</sup>

<sup>1</sup> Federal Research Center of Problems of Chemical Physics and Medicinal Chemistry, Russian Academy of Sciences, Academician Semenov ave. 1, Chernogolovka, Moscow Region, 142432 Russia

<sup>2</sup> N.D. Zelinsky Institute of Organic Chemistry, Russian Academy of Sciences, Moscow, 119991 Russia

<sup>3</sup> Dmitry Mendeleev University of Chemical Technology of Russia, Moscow, Russia

<sup>4</sup> Sechenov First Moscow State Medical University, Moscow, Russia

<sup>5</sup> A.N. Frumkin Institute of Physical Chemistry and Electrochemistry, Russian Academy of Sciences, Moscow, Russia

Correspondence: troshin2003@inbox.ru or troshin@icp.ac.ru

## Contents

|                                                                                                           |    |
|-----------------------------------------------------------------------------------------------------------|----|
| Table S1. Crystal data, data collection and structure refinement details refinement for <b>1</b> .....    | 4  |
| Figure S1. The molecular structure of <b>1</b> (p = 50%).....                                             | 5  |
| Table S2. Selected bond lengths [Å] for <b>1</b> .....                                                    | 5  |
| Table S3. Selected bond angles [°] for <b>1</b> .....                                                     | 6  |
| Table S4. Hydrogen bonds for <b>1</b> [Å and °].....                                                      | 6  |
| Figure S2. Hydrogen bonding in <b>1</b> .....                                                             | 6  |
| Figure S3. <sup>1</sup> H spectrum of compound <b>1</b> .....                                             | 7  |
| Figure S4. <sup>13</sup> C NMR spectrum of compound <b>1</b> .....                                        | 7  |
| Figure S5. HRMS spectra of compound <b>1</b> .....                                                        | 8  |
| Figure S6. <sup>1</sup> H NMR spectrum of compound <b>2</b> .....                                         | 9  |
| Figure S7. <sup>13</sup> C NMR spectrum of compound <b>2</b> .....                                        | 9  |
| Figure S8. HSQC NMR spectrum of compound <b>2</b> .....                                                   | 10 |
| Figure S9. HRMS spectra of <b>2</b> .....                                                                 | 11 |
| Figure S10. <sup>1</sup> H NMR spectrum of compound <b>3</b> .....                                        | 12 |
| Figure S11. <sup>13</sup> C NMR spectrum of compound <b>3</b> .....                                       | 12 |
| Figure S12. HSQC NMR spectrum of compound <b>3</b> .....                                                  | 13 |
| Figure S13. HRMS spectra of <b>3</b> .....                                                                | 14 |
| Figure S14. <sup>1</sup> H NMR spectrum of compound <b>4</b> .....                                        | 15 |
| Figure S15. HRMS spectrum of <b>4</b> .....                                                               | 16 |
| Figure S16. ESI-HRMS spectra (negative ion mode, MeOH) of the germanium dianion (z = 2) of <b>5</b> ..... | 17 |
| Figure S17. <sup>1</sup> H NMR spectrum of compound <b>5</b> .....                                        | 17 |

|                                                                                                                                                                                                                                                                                                                                                                                   |    |
|-----------------------------------------------------------------------------------------------------------------------------------------------------------------------------------------------------------------------------------------------------------------------------------------------------------------------------------------------------------------------------------|----|
| Figure S18. HRMS spectrum of <b>5</b> .....                                                                                                                                                                                                                                                                                                                                       | 18 |
| Figure S19. CV curves of oxidation and reduction of <b>2</b> in a 0.1 M Bu <sub>4</sub> NBF <sub>4</sub> /DMF supporting electrolyte on a glassy carbon disc electrode at a potential scan rate of 100 mV s <sup>-1</sup> . Absorbance and fluorescence spectra of <b>2</b> in DMF.....                                                                                           | 19 |
| Figure S20. CV curves of oxidation and reduction of <b>3</b> in a 0.1 M Bu <sub>4</sub> NBF <sub>4</sub> /DMF supporting electrolyte on a glassy carbon disc electrode at a potential scan rate of 100 mV s <sup>-1</sup> . Absorbance and fluorescence spectra of <b>3</b> in DMF. ....                                                                                          | 19 |
| Figure S21. CV curves of oxidation and reduction of <b>5</b> in a 0.1 M Bu <sub>4</sub> NBF <sub>4</sub> /DMF supporting electrolyte on a glassy carbon disc electrode at a potential scan rate of 100 mV s <sup>-1</sup> . Absorbance and fluorescence spectra of <b>5</b> in DMF.....                                                                                           | 20 |
| Figure S22. Thermal gravimetry profiles of compounds <b>1</b> (a), <b>2</b> (b), <b>3</b> (c), <b>4</b> (d), <b>5</b> (e) and <b>6</b> (f).                                                                                                                                                                                                                                       | 21 |
| Table S5. Modification of surface properties of PC <sub>61</sub> BM by interlayers <b>1-6</b>                                                                                                                                                                                                                                                                                     | 21 |
| Figure S23. <i>J</i> - <i>V</i> curves and EQE spectra of perovskite solar cells with different concentrations of compound <b>1</b> .....                                                                                                                                                                                                                                         | 22 |
| Table S6. Photovoltaic parameters of perovskite solar cells using compound <b>1</b> as interlayer.....                                                                                                                                                                                                                                                                            | 23 |
| Figure S24. <i>V</i> <sub>OC</sub> , <i>J</i> <sub>SC</sub> , FF and PCE of PSCs as a function of concentration of <b>2</b> . <i>J</i> - <i>V</i> curves and EQE of the best devices.....                                                                                                                                                                                         | 23 |
| Table S7. Photovoltaic parameters of best solar cells with using of <b>2</b> as interlayer.....                                                                                                                                                                                                                                                                                   | 24 |
| Figure S25. <i>V</i> <sub>OC</sub> , <i>J</i> <sub>SC</sub> , FF and PCE of PSCs as a function of concentration of <b>3</b> , <i>I</i> - <i>V</i> curves and EQE of the best devices.....                                                                                                                                                                                         | 24 |
| Table S8. Photovoltaic parameters of best solar cells with using of <b>3</b> as interlayer.....                                                                                                                                                                                                                                                                                   | 25 |
| Figure S26. <i>V</i> <sub>OC</sub> , <i>J</i> <sub>SC</sub> , FF and PCE of PSCs as a function of concentration of <b>4</b> , <i>I</i> - <i>V</i> curves and EQE of the best devices.....                                                                                                                                                                                         | 25 |
| Table S9. Photovoltaic parameters of best solar cells with using of <b>4</b> as interlayer.....                                                                                                                                                                                                                                                                                   | 26 |
| Figure S27. <i>V</i> <sub>OC</sub> , <i>J</i> <sub>SC</sub> , FF and PCE of PSCs as a function of concentration of <b>5</b> , <i>I</i> - <i>V</i> curves and EQE of the best devices.....                                                                                                                                                                                         | 26 |
| Table S10. Photovoltaic parameters of best solar cells with using of <b>5</b> as interlayer.....                                                                                                                                                                                                                                                                                  | 27 |
| Figure S28. <i>V</i> <sub>OC</sub> , <i>J</i> <sub>SC</sub> , FF and PCE of PSCs as a function of concentration of <b>6</b> , <i>I</i> - <i>V</i> curves and EQE of the best devices.....                                                                                                                                                                                         | 27 |
| Table S11. Photovoltaic parameters of best solar cells with using of <b>6</b> as interlayer.....                                                                                                                                                                                                                                                                                  | 28 |
| Figure S29. The evolution of the normalized open-circuit voltage (a), short-circuit current (b), fill factor (c) and power conversion efficiency (d) of perovskite solar cells using bare PC <sub>61</sub> BM and its combination with compound <b>1</b> as ETL materials.                                                                                                        | 29 |
| Figure S30. ATR FTIR spectra of MAPbI <sub>3</sub> , PC <sub>61</sub> BM and <b>1</b> .....                                                                                                                                                                                                                                                                                       | 29 |
| Figure S31. ATR FTIR spectra of MAPbI <sub>3</sub> , PC <sub>61</sub> BM and <b>2</b> .....                                                                                                                                                                                                                                                                                       |    |
| Figure S32. AFM topography of ITO/PTA/MAPbI <sub>3</sub> /PC <sub>61</sub> BM/ <b>2</b> film; mappings of ITO/PTA/MAPbI <sub>3</sub> /PC <sub>61</sub> BM/ <b>2</b> topography at frequencies of 962 cm <sup>-1</sup> , 1738 cm <sup>-1</sup> , and 1002 cm <sup>-1</sup> , which are characteristic for MAPbI <sub>3</sub> , PC <sub>61</sub> BM, and <b>2</b> , respectively... | 30 |
| Figure S33. ATR FTIR spectra of MAPbI <sub>3</sub> , PC <sub>61</sub> BM and <b>3</b> .....                                                                                                                                                                                                                                                                                       |    |
| Figure S34. AFM topography of ITO/PTA/MAPbI <sub>3</sub> /PC <sub>61</sub> BM/ <b>3</b> film; mappings of ITO/PTA/MAPbI <sub>3</sub> /PC <sub>61</sub> BM/ <b>3</b> topography at frequencies of 1249 cm <sup>-1</sup> , 1738 cm <sup>-1</sup> and 1519 cm <sup>-1</sup> , which are characteristic for MAPbI <sub>3</sub> , PC <sub>61</sub> BM, and <b>3</b> , respectively     | 31 |
| Figure S35. ATR FTIR spectra of MAPbI <sub>3</sub> , PC <sub>61</sub> BM and <b>4</b> .....                                                                                                                                                                                                                                                                                       |    |
| Figure S36. AFM topography of ITO/PTA/MAPbI <sub>3</sub> /PC <sub>61</sub> BM/ <b>4</b> film; mappings of ITO/PTA/MAPbI <sub>3</sub> /PC <sub>61</sub> BM/ <b>4</b> topography at frequencies of 962 cm <sup>-1</sup> , 1738 cm <sup>-1</sup> and 1146 cm <sup>-1</sup> , which are characteristic for <b>4</b> , PC <sub>61</sub> BM, and MAPbI <sub>3</sub> , respectively..... | 32 |

|                                                                                                                                                                                                                                                                                                                                                                                     |    |
|-------------------------------------------------------------------------------------------------------------------------------------------------------------------------------------------------------------------------------------------------------------------------------------------------------------------------------------------------------------------------------------|----|
| Figure S37. ATR FTIR spectra of MAPbI <sub>3</sub> , PC <sub>61</sub> BM and <b>5</b> .....                                                                                                                                                                                                                                                                                         |    |
| Figure S38. AFM topography of ITO/PTA/MAPbI <sub>3</sub> /PC <sub>61</sub> BM/ <b>5</b> film; mappings of ITO/PTA/MAPbI <sub>3</sub> /PC <sub>61</sub> BM/ <b>5</b> topography at frequencies of 962 cm <sup>-1</sup> , 1738 cm <sup>-1</sup> , and 1199 cm <sup>-1</sup> , which are characteristic for <b>5</b> , PC <sub>61</sub> BM, and MAPbI <sub>3</sub> , respectively..... | 33 |
| Figure S39. ATR FTIR spectra of MAPbI <sub>3</sub> , PC <sub>61</sub> BM and <b>6</b> .....                                                                                                                                                                                                                                                                                         |    |
| Figure S40. AFM topography of ITO/PTA/MAPbI <sub>3</sub> /PC <sub>61</sub> BM/ <b>6</b> film; mappings of ITO/PTA/MAPbI <sub>3</sub> /PC <sub>61</sub> BM/ <b>6</b> topography at frequencies of 962 cm <sup>-1</sup> , 1738 cm <sup>-1</sup> , and 1586 cm <sup>-1</sup> , which are characteristic for <b>6</b> , PC <sub>61</sub> BM, and MAPbI <sub>3</sub> , respectively..... |    |

**Table S1.** Crystal data, data collection and structure refinement details refinement for **1**.

|                                             |                                          |                    |
|---------------------------------------------|------------------------------------------|--------------------|
| Empirical formula                           | C30 H46 N2 O6 Sn2                        |                    |
| Formula weight                              | 768.07                                   |                    |
| Temperature                                 | 100.15 K                                 |                    |
| Wavelength                                  | 0.71073 Å                                |                    |
| Crystal system                              | Monoclinic                               |                    |
| Space group                                 | P2 <sub>1</sub> /c                       |                    |
| Unit cell dimensions                        | a = 8.34430(10) Å                        | α = 90°.           |
|                                             | b = 12.85750(10) Å                       | β = 101.7940(10)°. |
|                                             | c = 14.5864(2) Å                         | γ = 90°.           |
| Volume                                      | 1531.89(3) Å <sup>3</sup>                |                    |
| Z                                           | 2                                        |                    |
| Density (calculated)                        | 1.665 g/cm <sup>3</sup>                  |                    |
| Absorption coefficient                      | 1.675 mm <sup>-1</sup>                   |                    |
| F(000)                                      | 776                                      |                    |
| Crystal size                                | 0.12 x 0.04 x 0.03 mm <sup>3</sup>       |                    |
| Theta range for data collection             | 2.131 to 35.833°.                        |                    |
| Index ranges                                | -13 ≤ h ≤ 13, -20 ≤ k ≤ 19, -22 ≤ l ≤ 23 |                    |
| Reflections collected                       | 59080                                    |                    |
| Independent reflections                     | 6721 [R(int) = 0.0454]                   |                    |
| Observed reflections                        | 5974                                     |                    |
| Completeness to θ <sub>full</sub> = 25.242° | 1.000                                    |                    |
| Max. and min. transmission                  | 1.00000 and 0.55356                      |                    |
| Data / restraints / parameters              | 6721 / 4 / 201                           |                    |
| Goodness-of-fit on F <sup>2</sup>           | 1.038                                    |                    |
| Final R indices [I > 2σ(I)]                 | R1 = 0.0234, wR2 = 0.0547                |                    |
| R indices (all data)                        | R1 = 0.0293, wR2 = 0.0575                |                    |
| Largest diff. peak and hole                 | 1.509 and -0.991 e.Å <sup>-3</sup>       |                    |

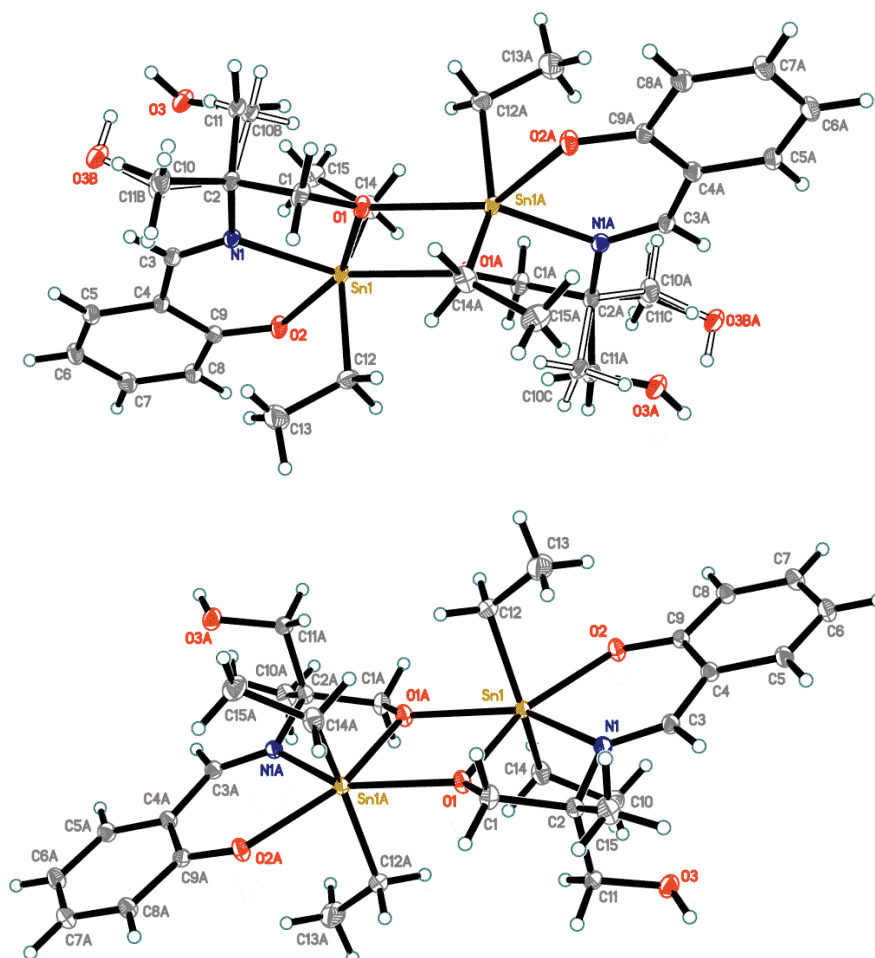

**Figure S1.** The molecular structure of **1** ( $p = 50\%$ ). A minor component of the OH disorder is shown in open solid lines; the disorder ratio is 0.909(3):0.091(3) (top). The disorder is omitted (bottom).

**Table S2.** Selected bond lengths [Å] for **1**.

|              |            |           |            |              |          |
|--------------|------------|-----------|------------|--------------|----------|
| Sn(1)-O(1)   | 2.0992(10) | N(1)-C(3) | 1.2942(16) | O(3A)-C(11A) | 1.412(3) |
| Sn(1)-O(2)   | 2.4090(10) | C(1)-C(2) | 1.5358(19) | C(11A)-C(2)  | 1.545(2) |
| Sn(1)-O(1)#1 |            |           |            |              |          |
| Sn(1)-O(2)   | 2.2658(10) | C(4)-C(3) | 1.4431(18) | C(10A)-C(2)  | 1.528(2) |
| Sn(1)-N(1)   | 2.2369(11) | C(4)-C(9) | 1.4242(19) | O(3B)-C(11B) | 1.412(4) |
| Sn(1)-C(12)  | 2.1298(14) | C(4)-C(5) | 1.4146(18) | C(11B)-C(2)  | 1.545(4) |
| Sn(1)-C(14)  | 2.1365(14) | C(6)-C(5) | 1.3781(19) | C(10B)-C(2)  | 1.528(4) |
| O(2)-C(9)    | 1.3085(16) | C(6)-C(7) | 1.400(2)   | C(12)-C(13)  | 1.523(2) |
| O(1)-C(1)    | 1.4078(16) | C(8)-C(7) | 1.3791(19) | C(14)-C(15)  | 1.528(2) |
| N(1)-C(2)    | 1.4850(17) | C(8)-C(9) | 1.4175(18) |              |          |

Symmetry transformations used to generate equivalent atoms: #1 -x+1,-y,-z+1

**Table S3.** Selected bond angles [°] for **1**.

|                    |           |                    |            |
|--------------------|-----------|--------------------|------------|
| O(2)-Sn(1)-O(1)#1  | 133.29(3) | C(14)-Sn(1)-O(2)   | 84.83(5)   |
| O(1)-Sn(1)-O(2)    | 157.64(4) | C(14)-Sn(1)-O(1)#1 | 83.85(5)   |
| O(1)-Sn(1)-O(1)#1  | 69.07(4)  | C(14)-Sn(1)-N(1)   | 105.92(5)  |
| O(1)-Sn(1)-N(1)    | 76.33(4)  | C(9)-O(2)-Sn(1)    | 132.51(8)  |
| O(1)-Sn(1)-C(12)   | 101.62(5) | Sn(1)-O(1)-Sn(1)#1 | 110.93(4)  |
| O(1)-Sn(1)-C(14)   | 100.17(5) | C(1)-O(1)-Sn(1)    | 115.20(8)  |
| N(1)-Sn(1)-O(2)    | 81.34(4)  | C(1)-O(1)-Sn(1)#1  | 128.70(8)  |
| N(1)-Sn(1)-O(1)#1  | 145.23(4) | C(3)-N(1)-Sn(1)    | 128.28(9)  |
| C(12)-Sn(1)-O(2)   | 84.13(5)  | C(2)-N(1)-Sn(1)    | 113.04(8)  |
| C(12)-Sn(1)-O(1)#1 | 81.73(5)  | C(13)-C(12)-Sn(1)  | 115.66(10) |
| C(12)-Sn(1)-N(1)   | 102.52(5) | C(15)-C(14)-Sn(1)  | 115.35(10) |
| C(12)-Sn(1)-C(14)  | 147.46(6) |                    |            |

Symmetry transformations used to generate equivalent atoms: #1 -x+1,-y,-z+1

**Table S4.** Hydrogen bonds for **1** [Å and °].

| D-H...A              | d(D-H)  | d(H...A) | d(D...A)   | <(DHA) |
|----------------------|---------|----------|------------|--------|
| O(3B)-H(3B)...O(2)#2 | 0.83    | 2.35     | 3.036(12)  | 140.0  |
| O(3A)-H(3A)...O(2)#2 | 0.83(3) | 1.97(3)  | 2.7712(16) | 161(3) |

Symmetry transformations used to generate equivalent atoms: #1 -x+1, -y, -z+1 ; #2 x, -y+1/2, z+1/2

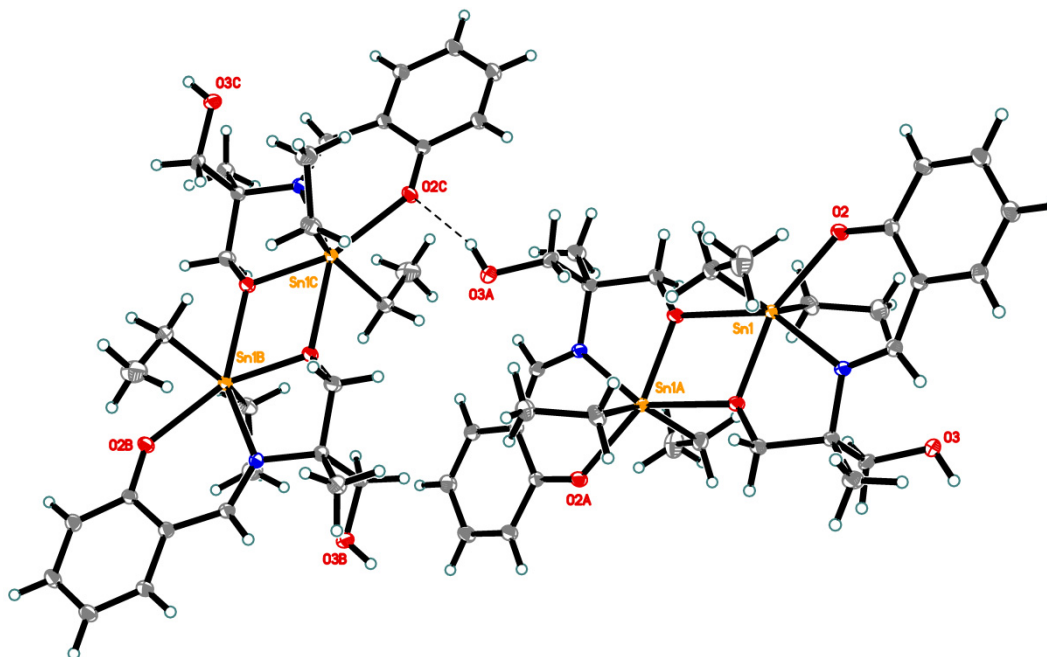**Figure S2.** Hydrogen bonding in **1**. The OH disorder is omitted.

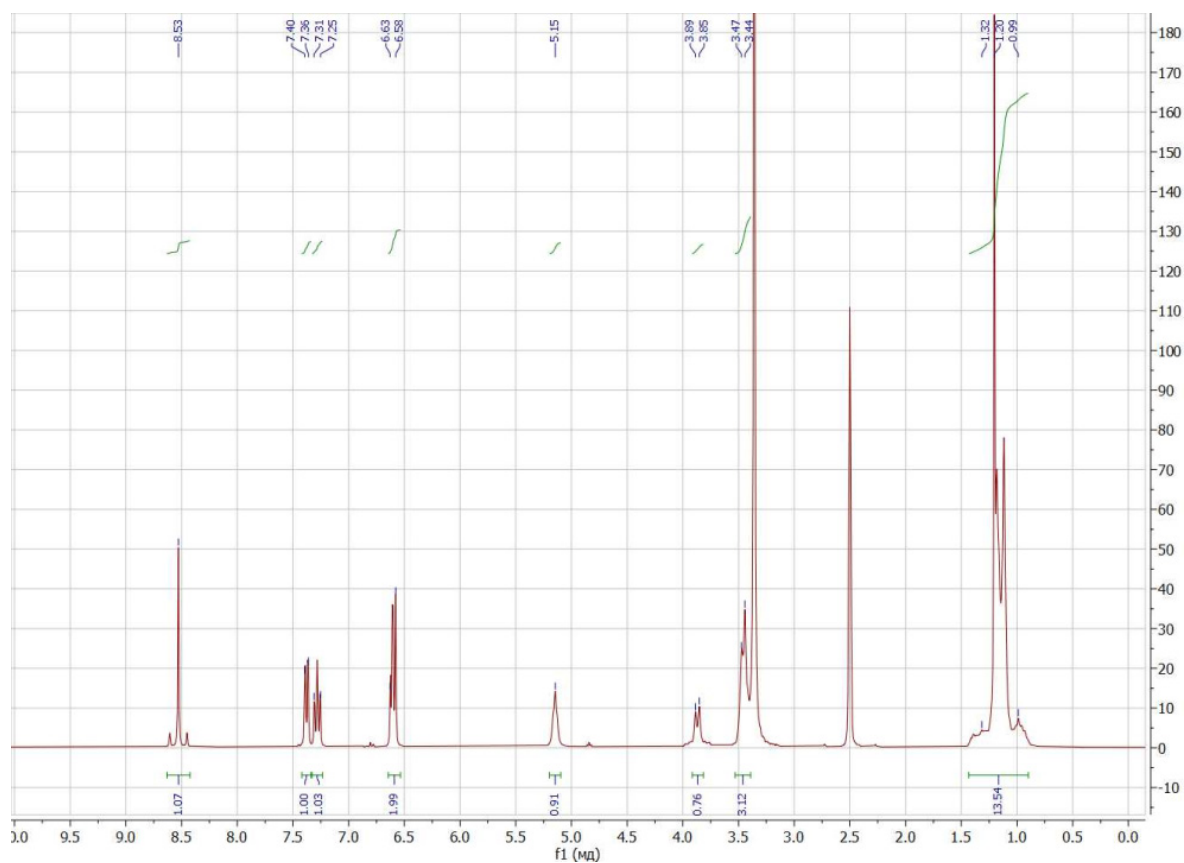

**Figure S3.**  $^1\text{H}$  spectrum of compound 1.

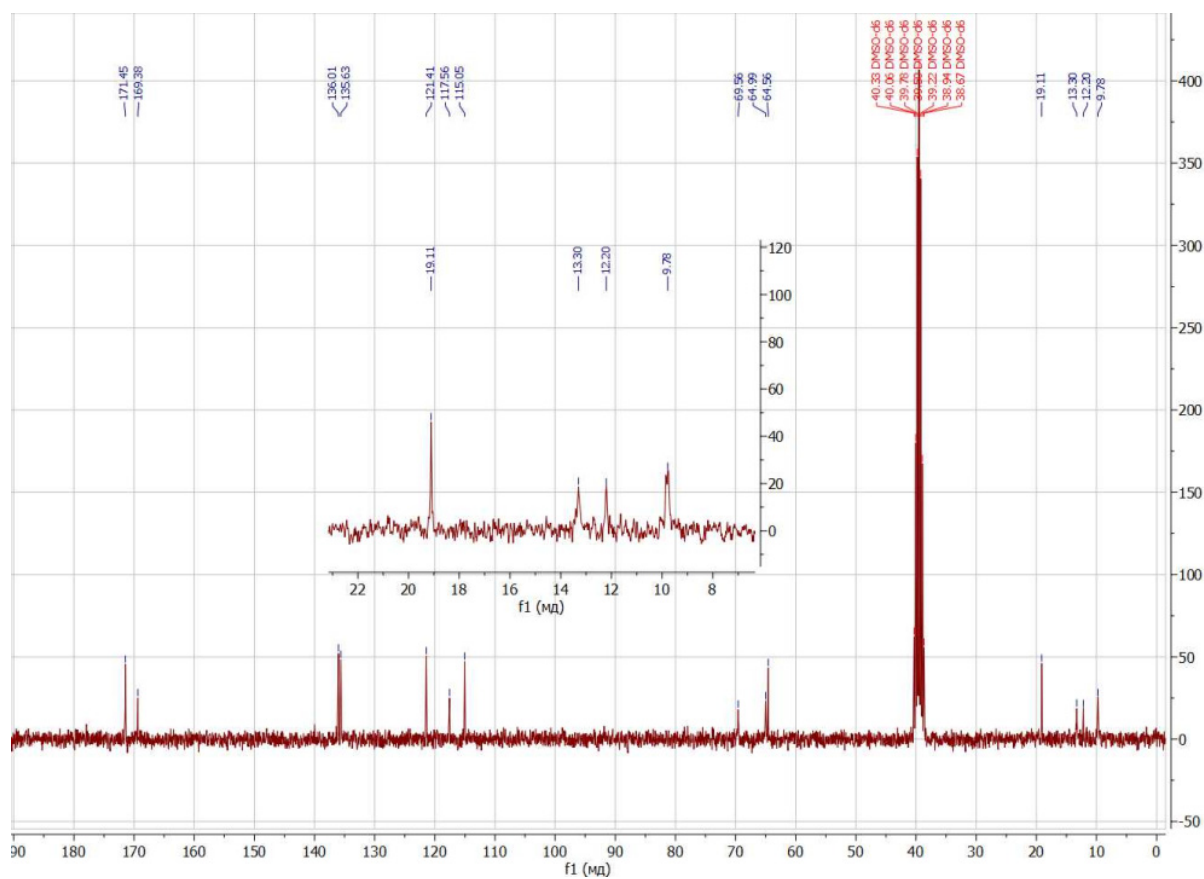

**Figure S4.**  $^{13}\text{C}$  NMR spectrum of compound 1.

**Acquisition Parameter**

|             |            |                      |          |                  |           |
|-------------|------------|----------------------|----------|------------------|-----------|
| Source Type | ESI        | Ion Polarity         | Positive | Set Nebulizer    | 1.0 Bar   |
| Focus       | Not active |                      |          | Set Dry Heater   | 200 °C    |
| Scan Begin  | 50 m/z     | Set Capillary        | 4500 V   | Set Dry Gas      | 4.0 l/min |
| Scan End    | 1600 m/z   | Set End Plate Offset | -500 V   | Set Divert Valve | Waste     |

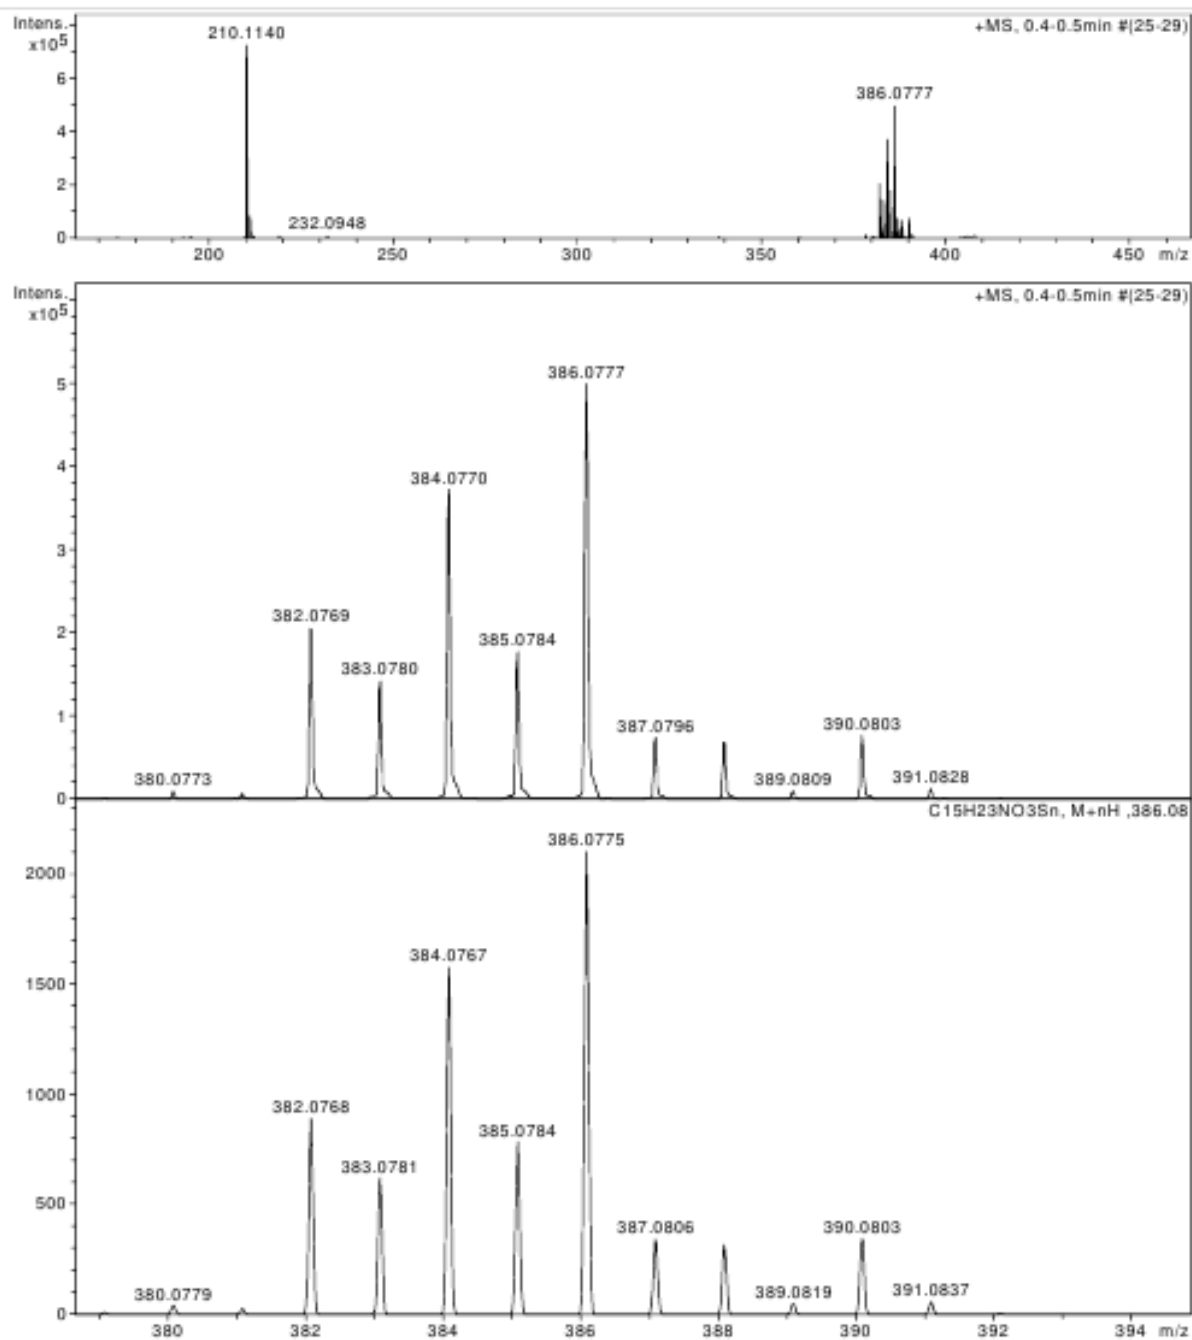

**Figure S5.** HRMS spectra of compound **1**.



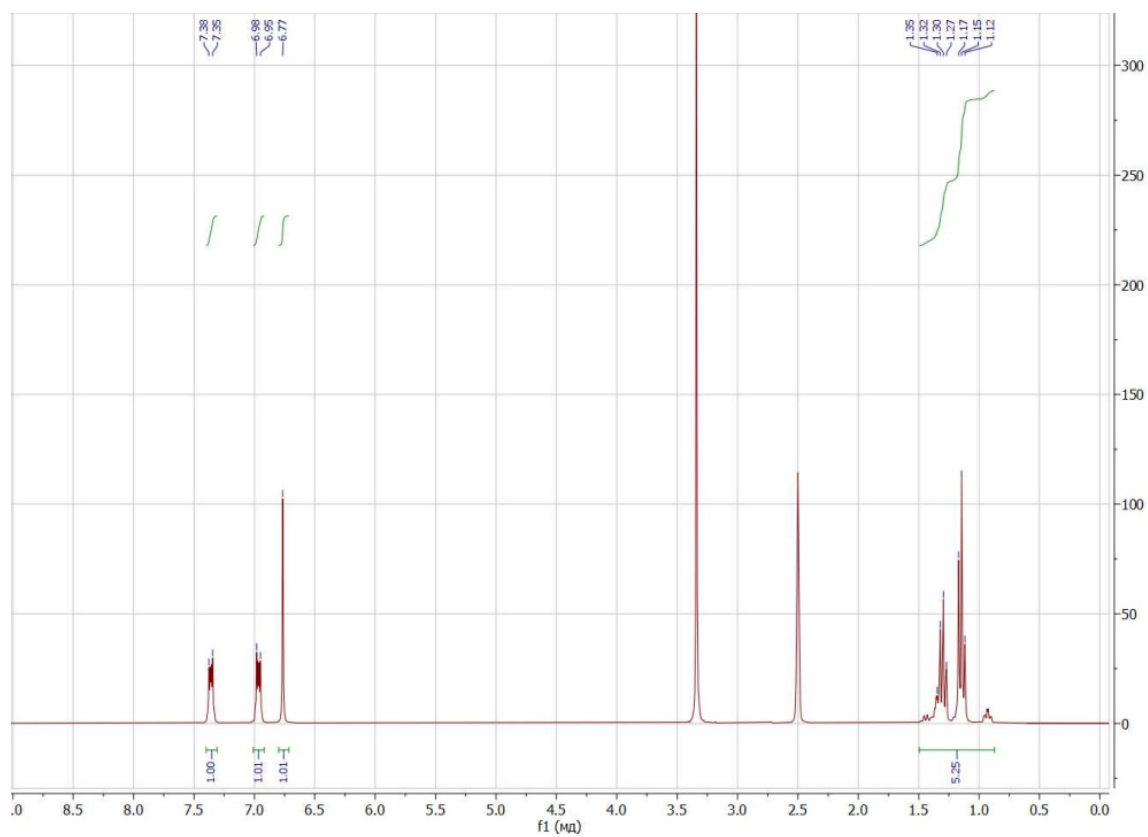

Figure S6. <sup>1</sup>H NMR spectrum of compound 2.

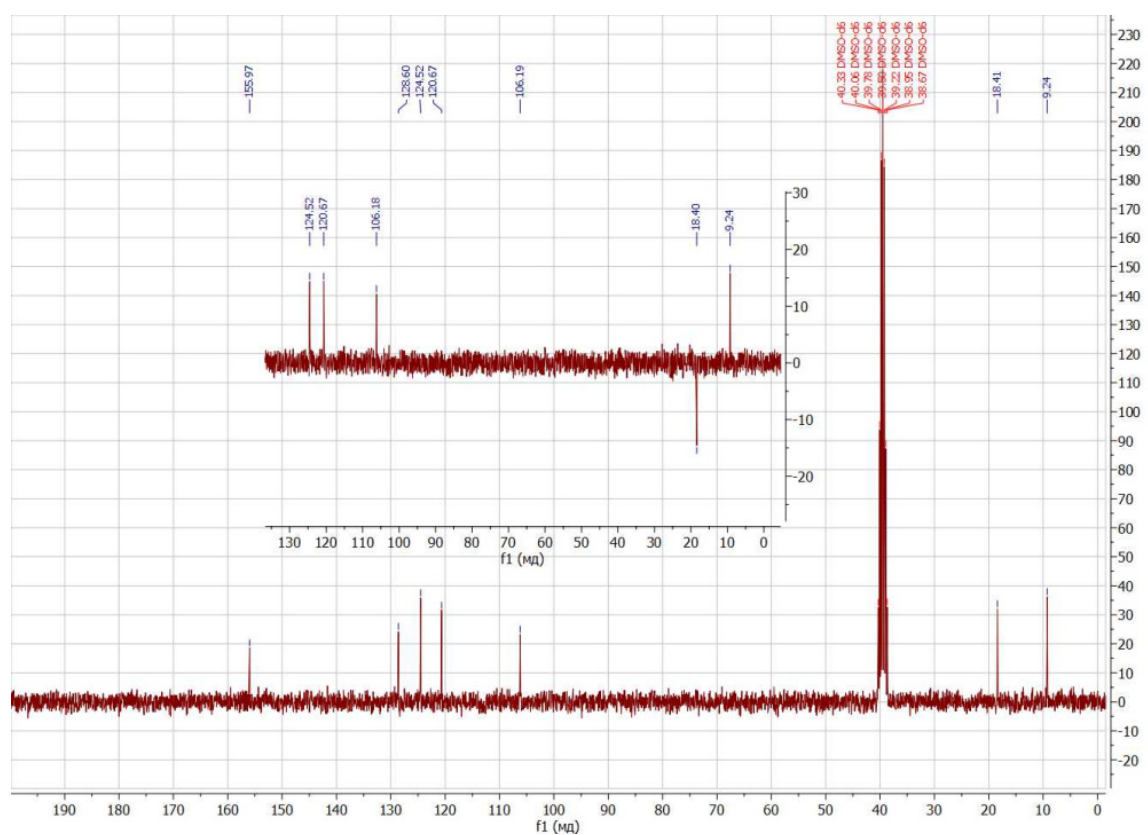

Figure S7. <sup>13</sup>C NMR spectrum of compound 2.

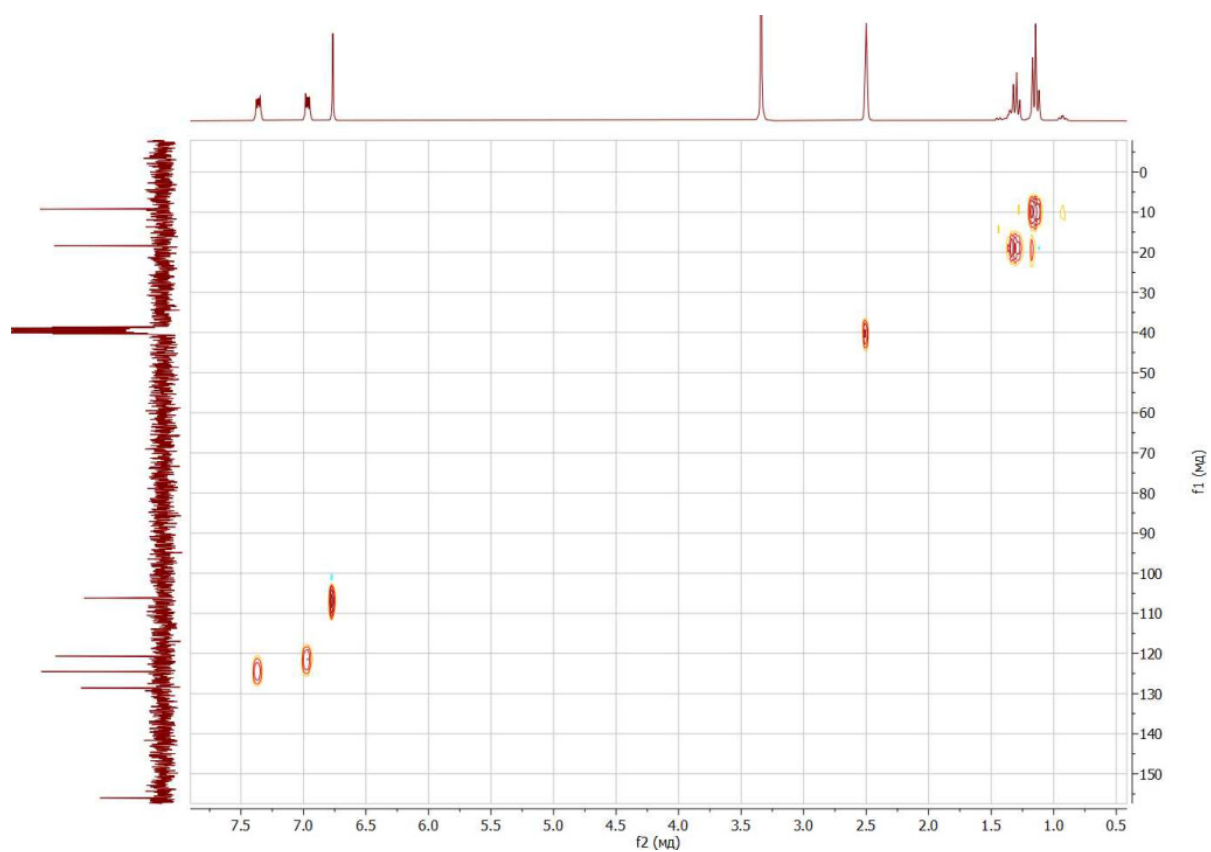

**Figure S8.** HSQC NMR spectrum of compound **2**.

**Acquisition Parameter**

|             |            |                      |          |                  |           |
|-------------|------------|----------------------|----------|------------------|-----------|
| Source Type | ESI        | Ion Polarity         | Positive | Set Nebulizer    | 1.0 Bar   |
| Focus       | Not active |                      |          | Set Dry Heater   | 200 °C    |
| Scan Begin  | 50 m/z     | Set Capillary        | 4500 V   | Set Dry Gas      | 4.0 l/min |
| Scan End    | 1600 m/z   | Set End Plate Offset | -500 V   | Set Divert Valve | Waste     |

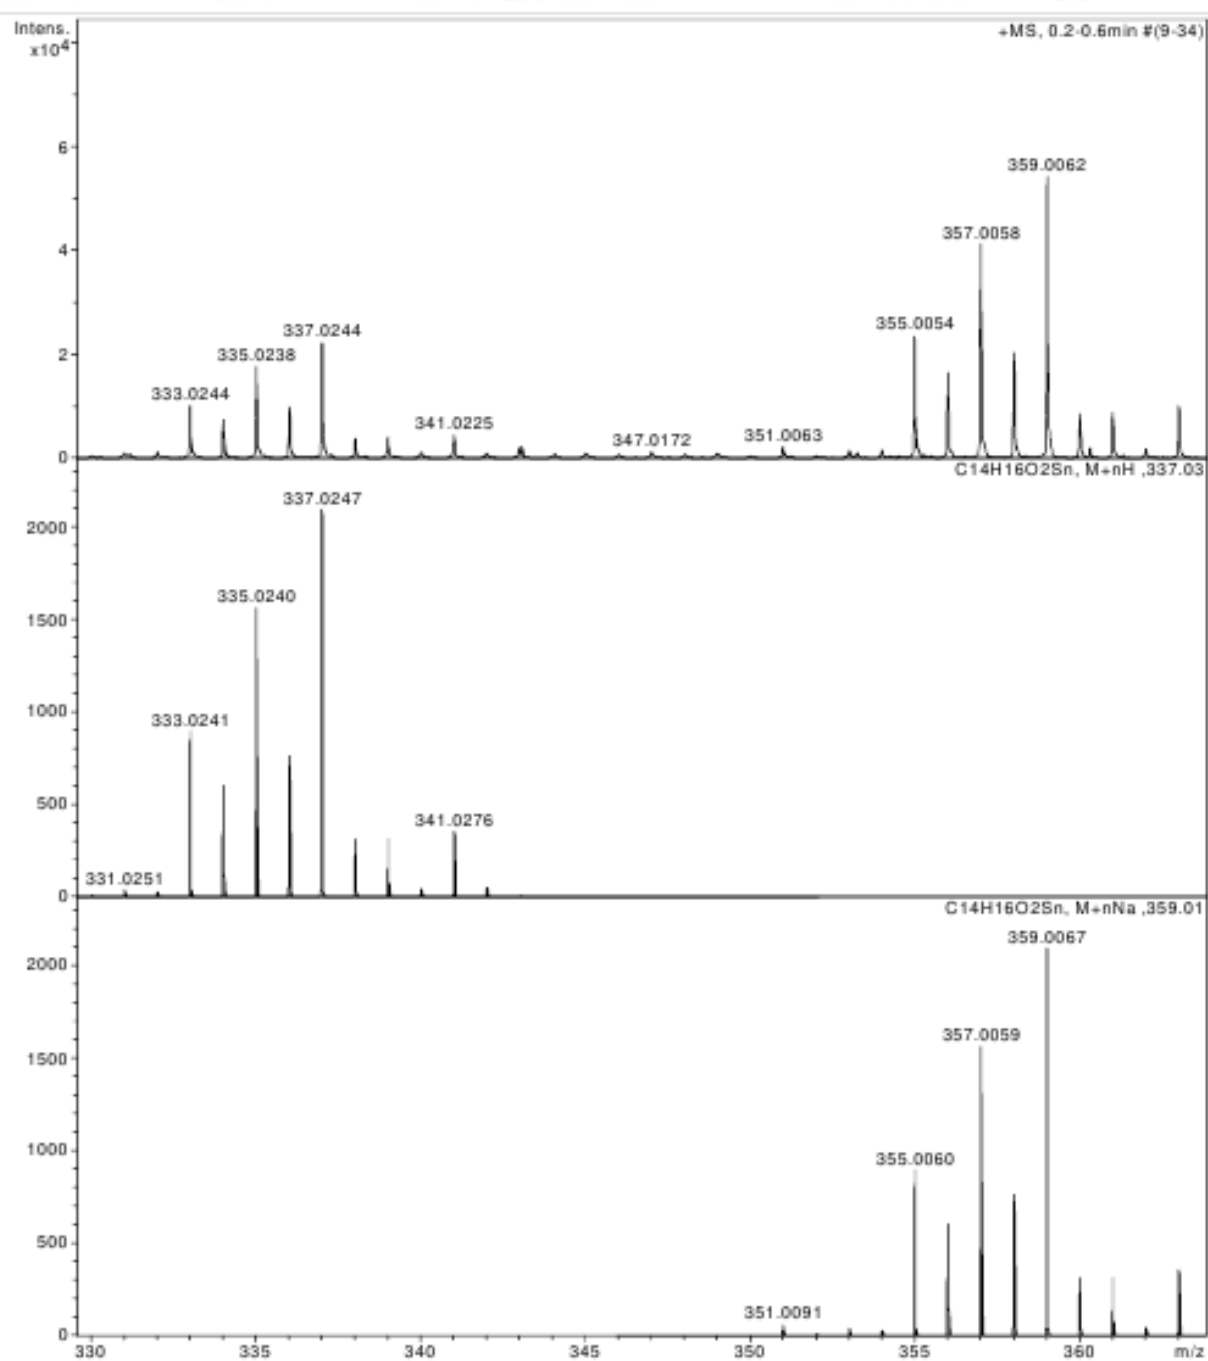

**Figure S9.** HRMS spectra of **2**.

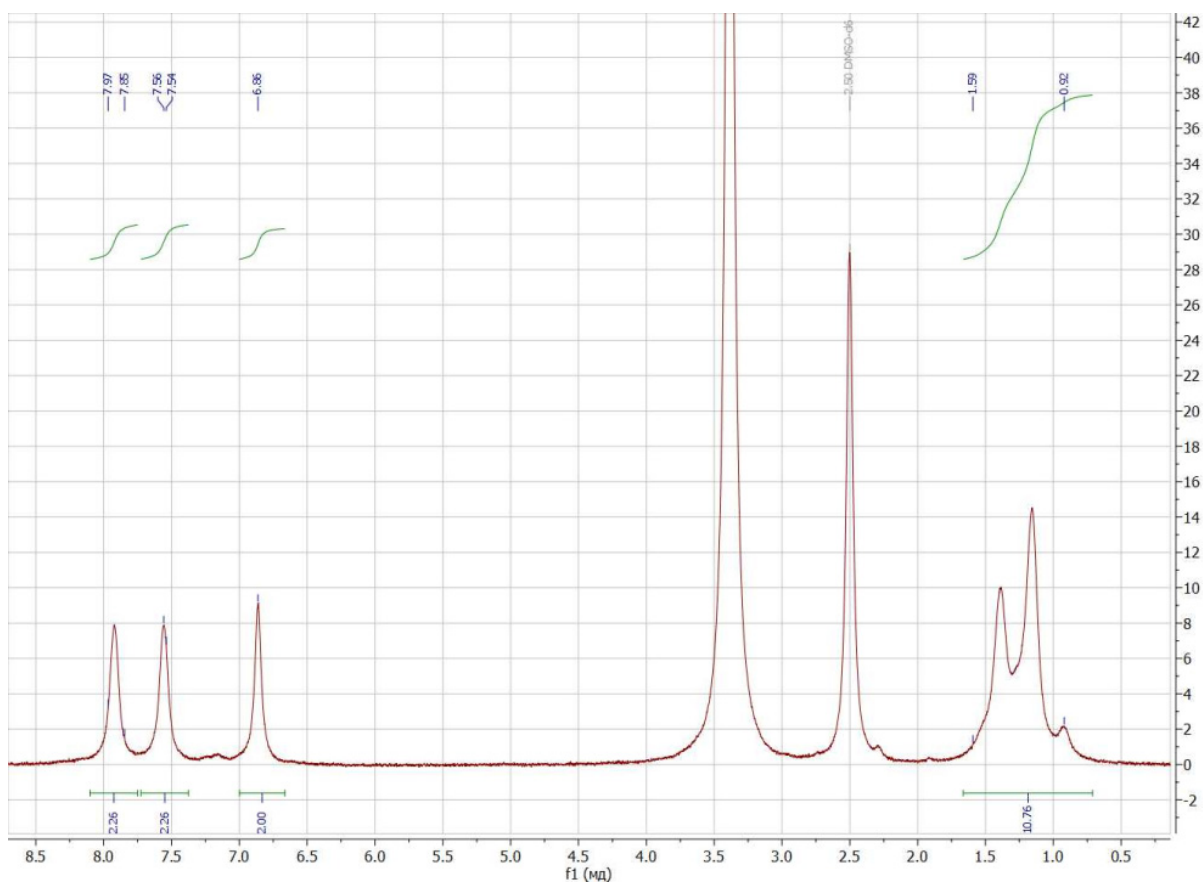

Figure S10.  $^1\text{H}$  NMR spectrum of compound **3**.

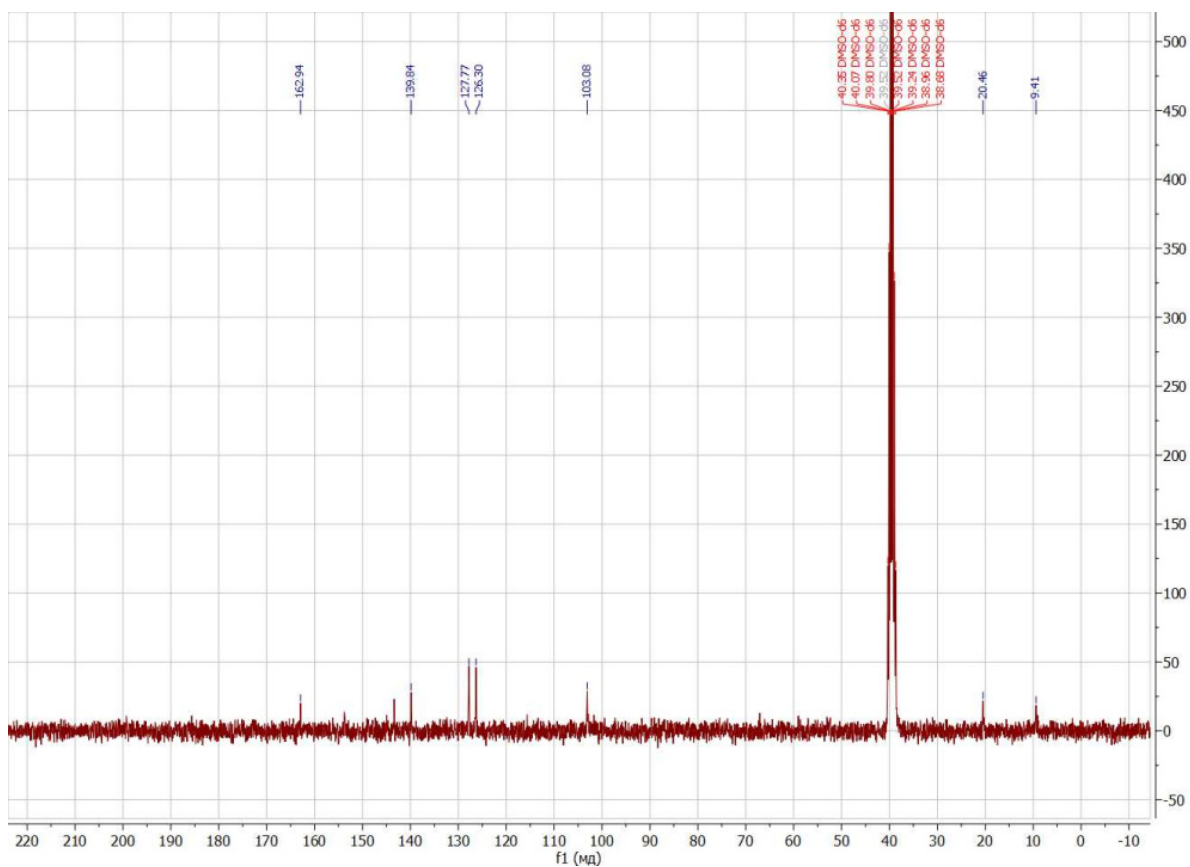

Figure S11.  $^{13}\text{C}$  NMR spectrum of compound **3**.

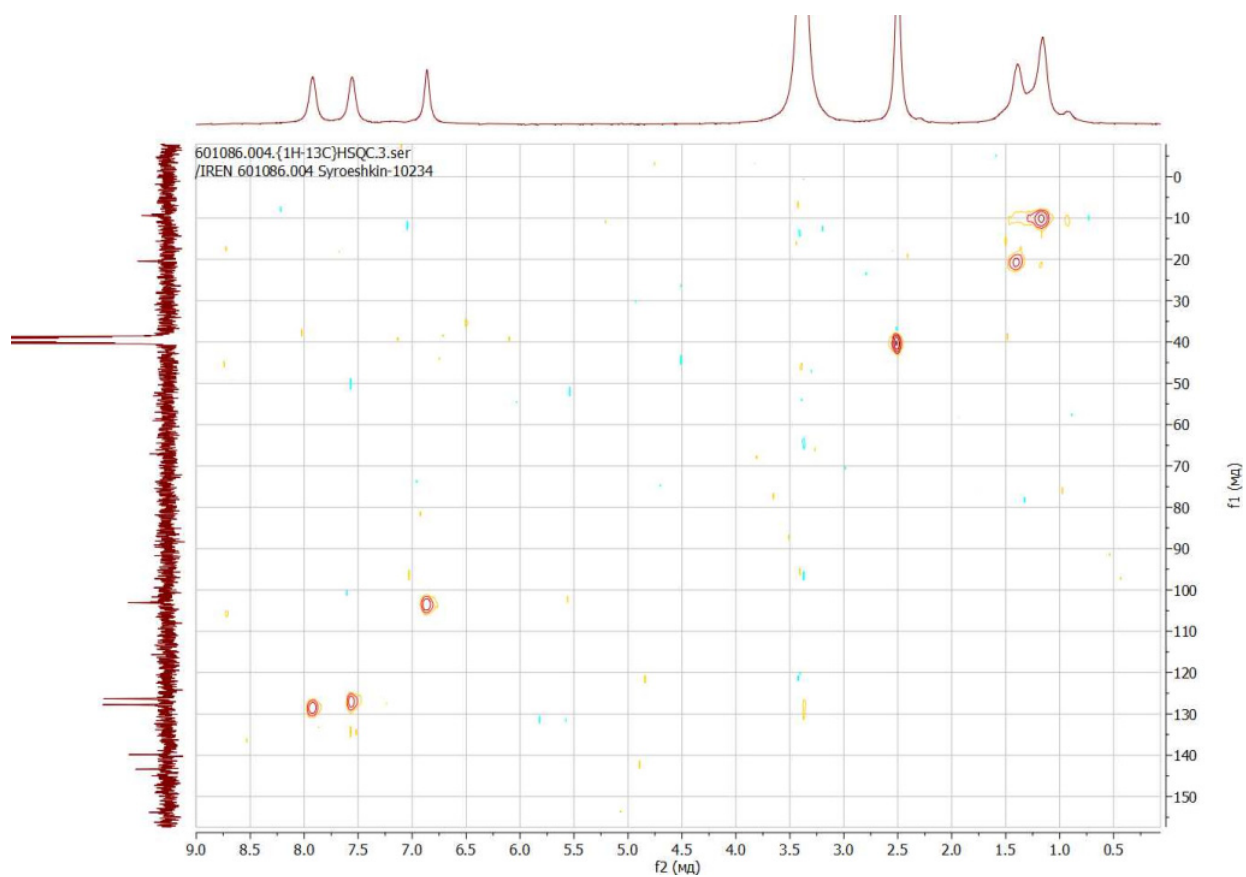

**Figure S12.** HSQC NMR spectrum of compound **3**.

**Acquisition Parameter**

|             |            |                      |          |                  |           |
|-------------|------------|----------------------|----------|------------------|-----------|
| Source Type | ESI        | Ion Polarity         | Positive | Set Nebulizer    | 1.0 Bar   |
| Focus       | Not active |                      |          | Set Dry Heater   | 200 °C    |
| Scan Begin  | 50 m/z     | Set Capillary        | 4500 V   | Set Dry Gas      | 4.0 l/min |
| Scan End    | 1600 m/z   | Set End Plate Offset | -500 V   | Set Divert Valve | Waste     |

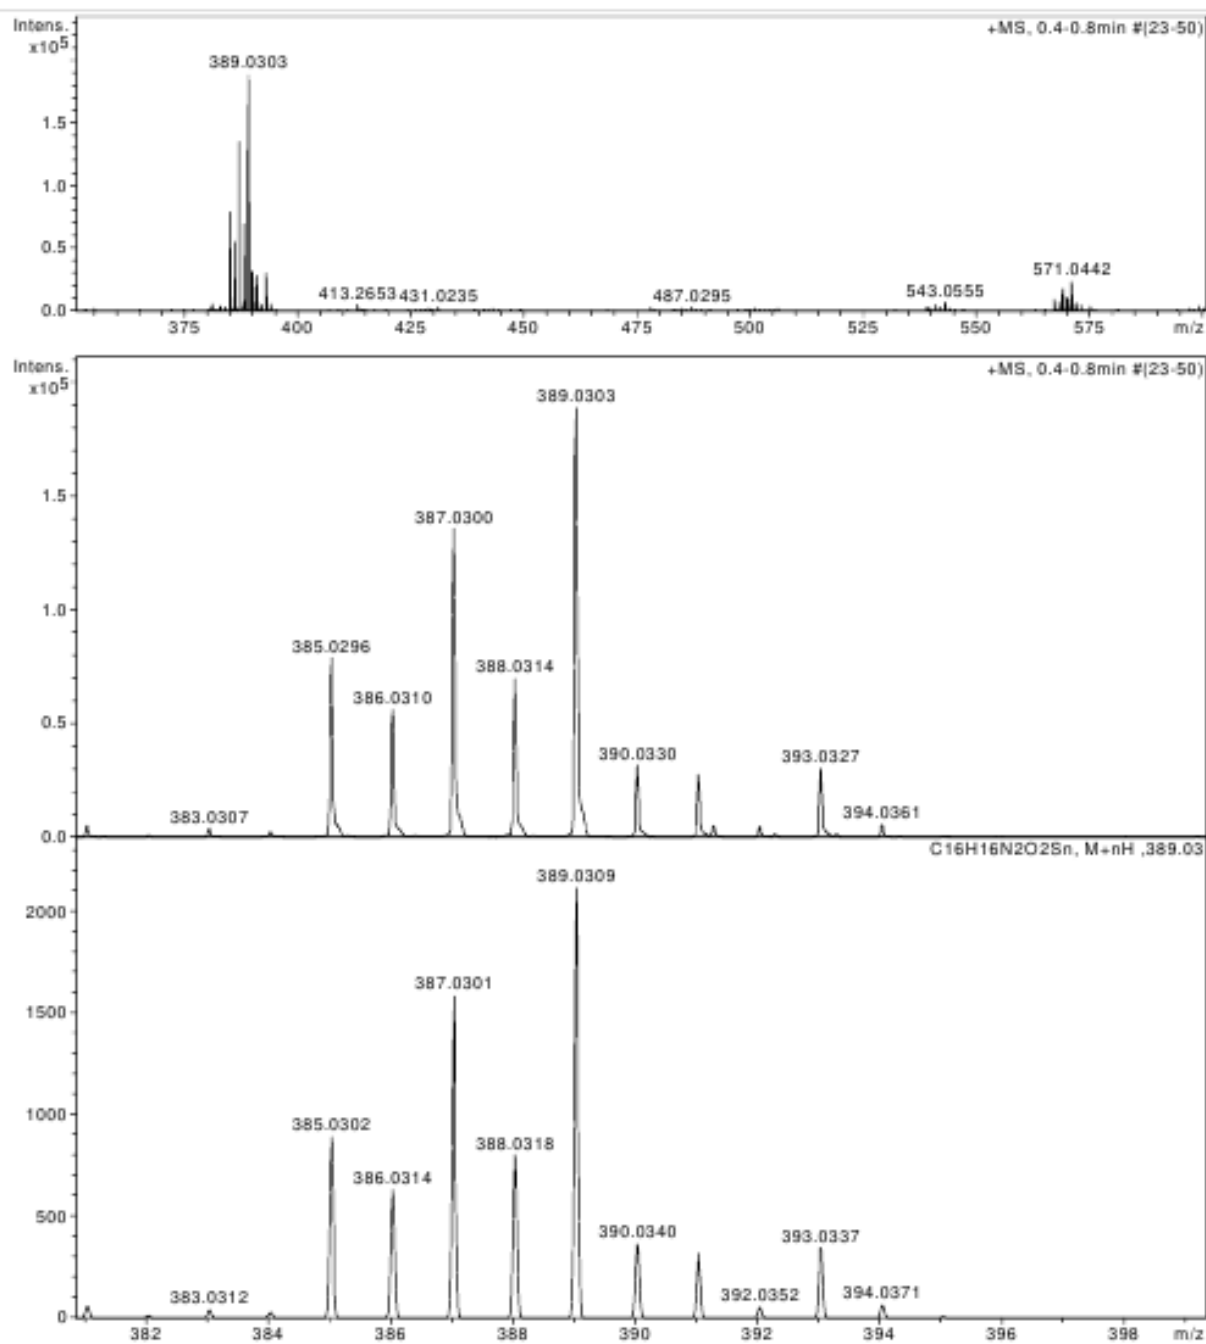

**Figure S13.** HRMS spectra of **3**.

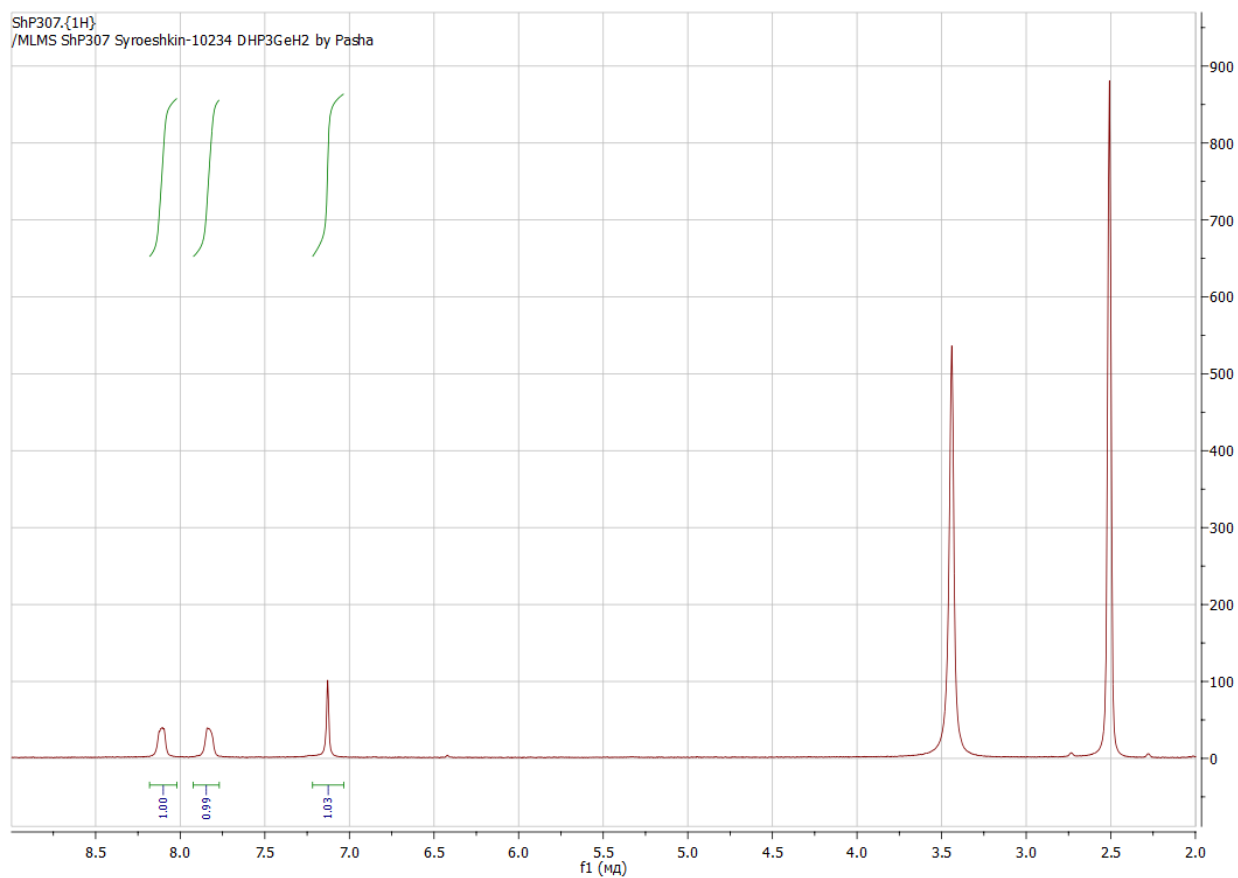

**Figure S14.**  $^1\text{H}$  NMR spectrum of compound **4**.

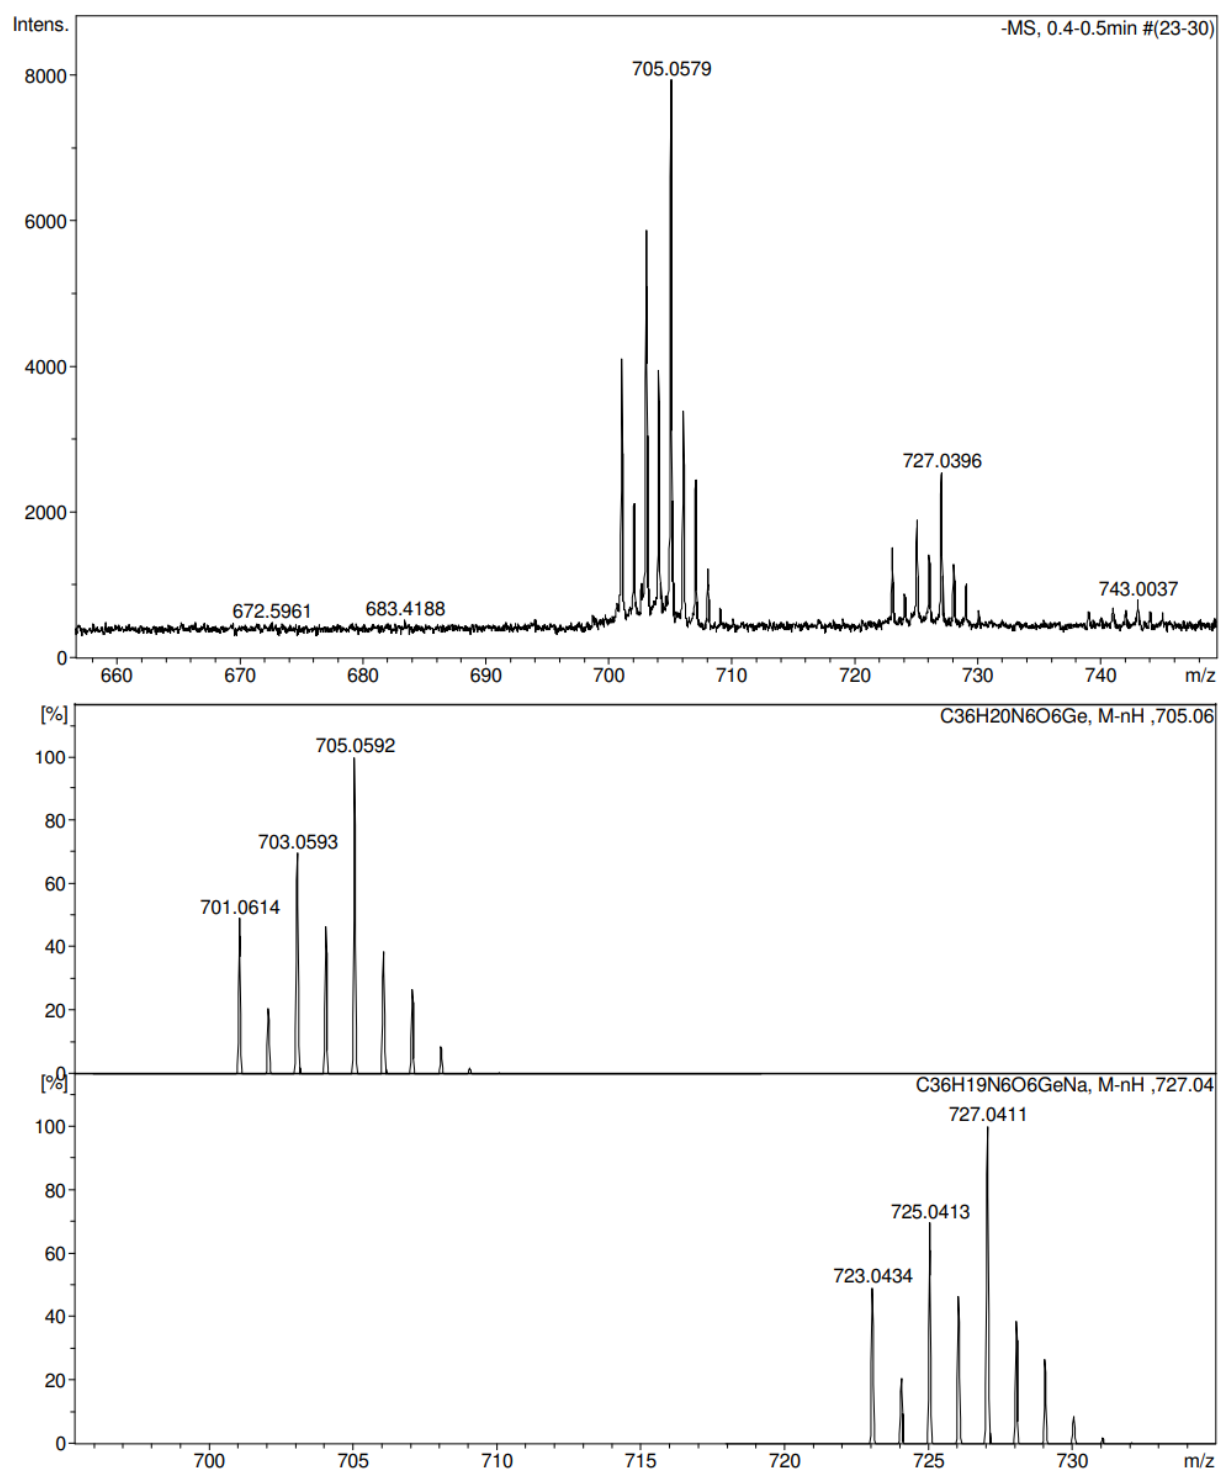

**Figure S15.** HRMS spectrum of **4**.



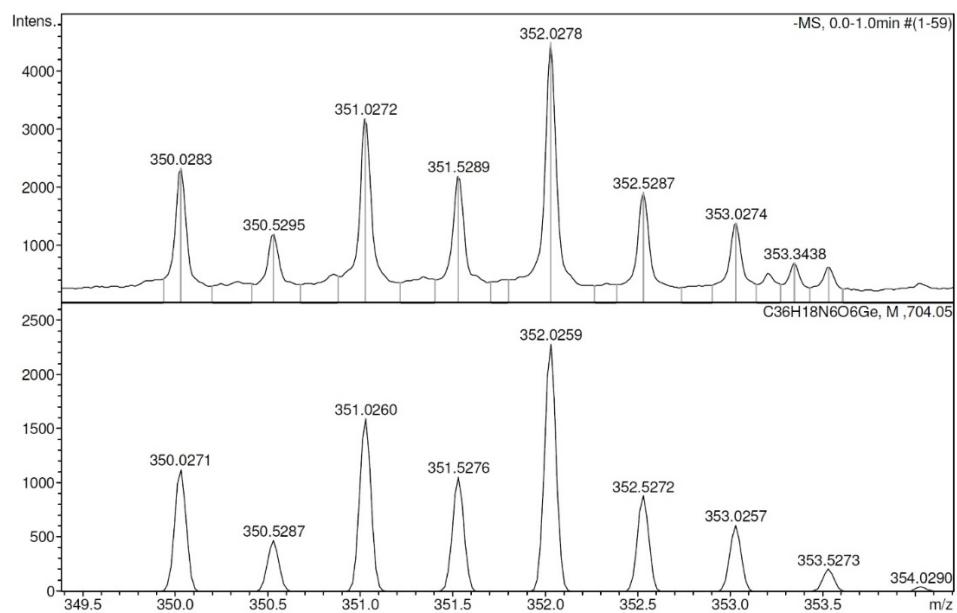

**Figure S16.** ESI-HRMS spectra (negative ion mode, MeOH) of the germanium dianion ( $z = 2$ ) of **5**.

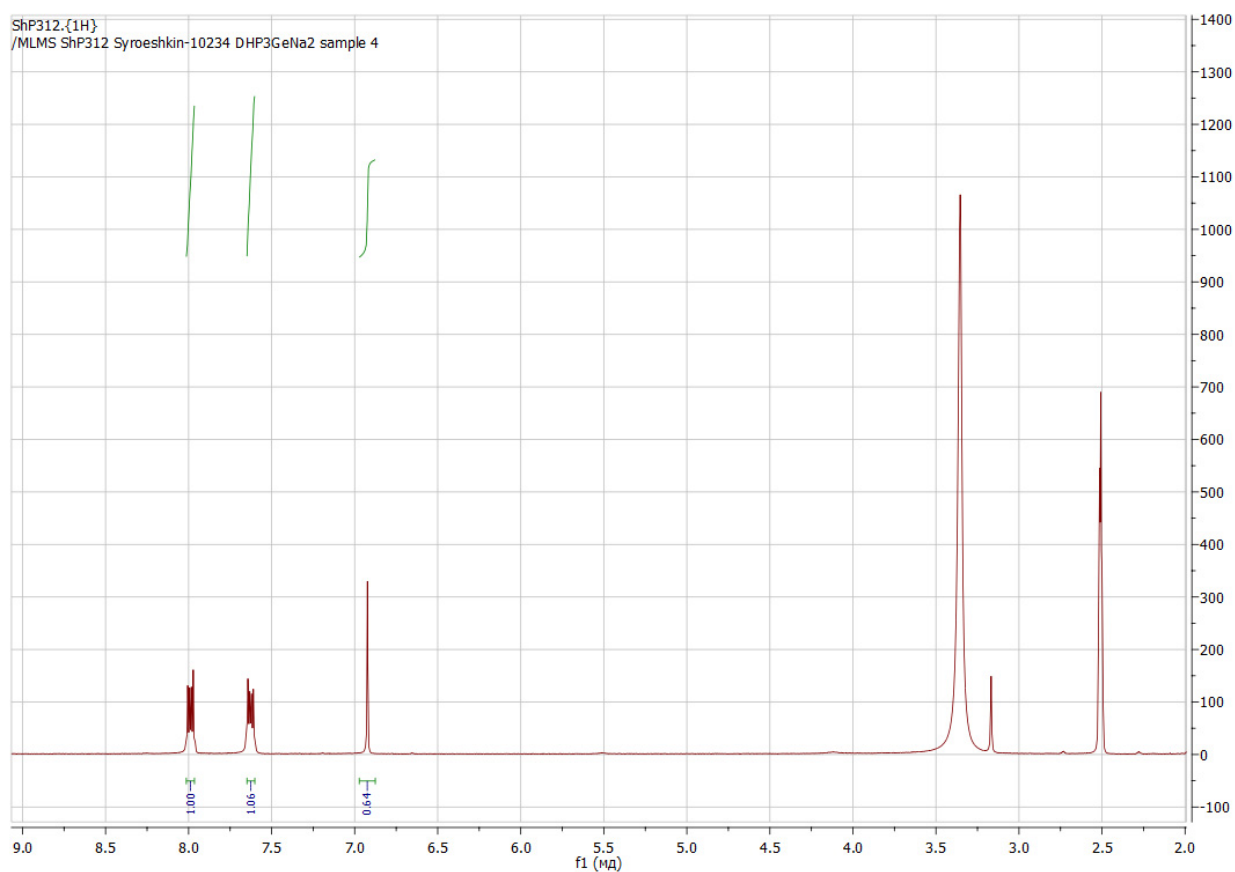

**Figure S17.**  $^1H$  NMR spectrum of compound **5**.

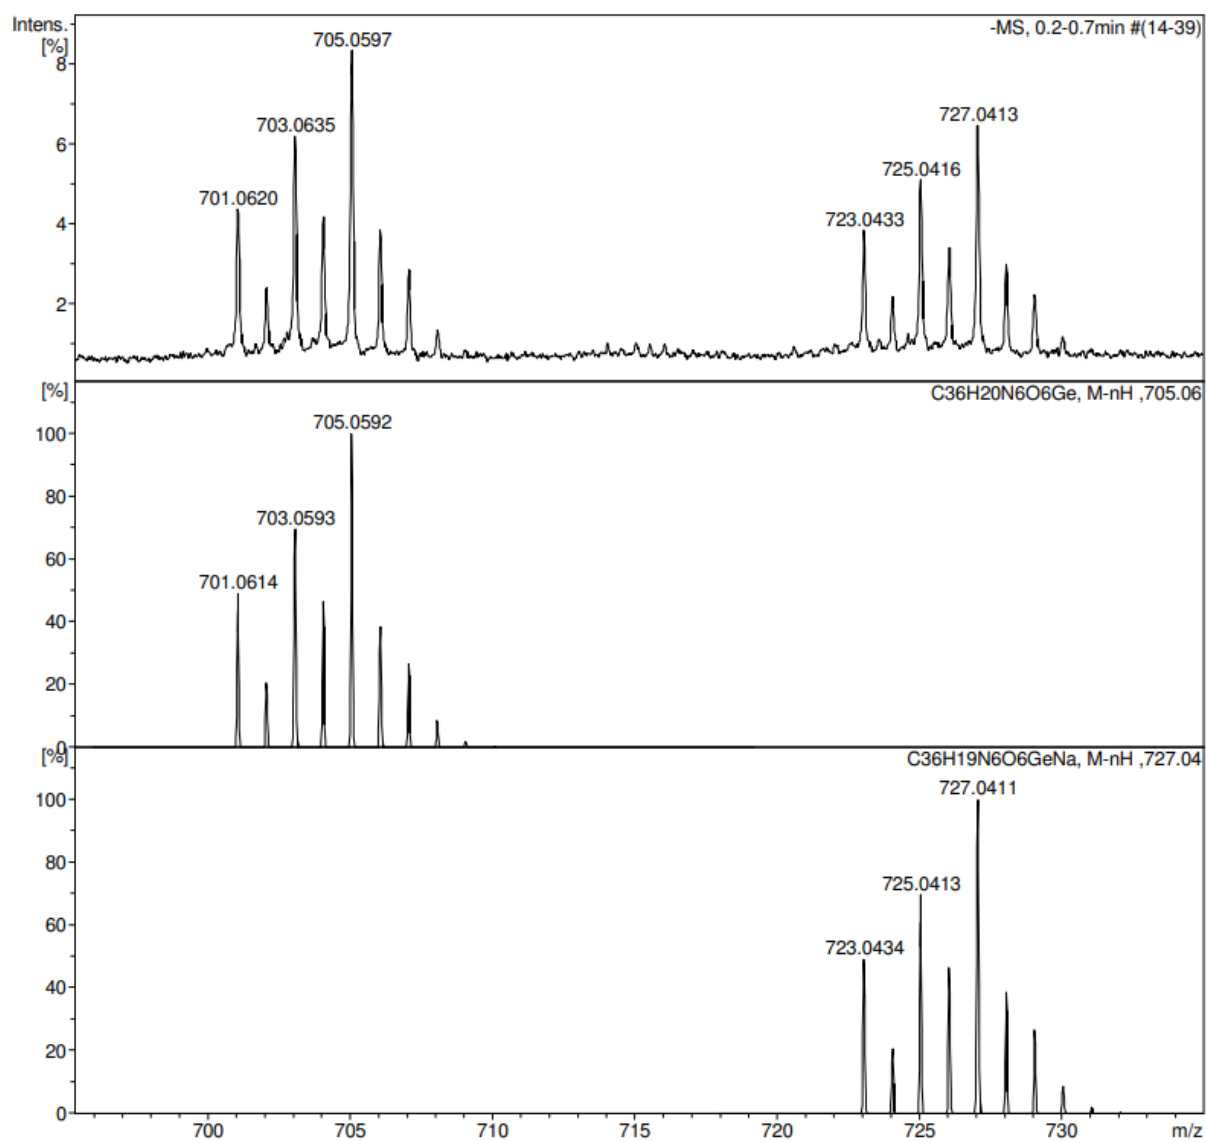

**Figure S18.** HRMS spectrum of 5.

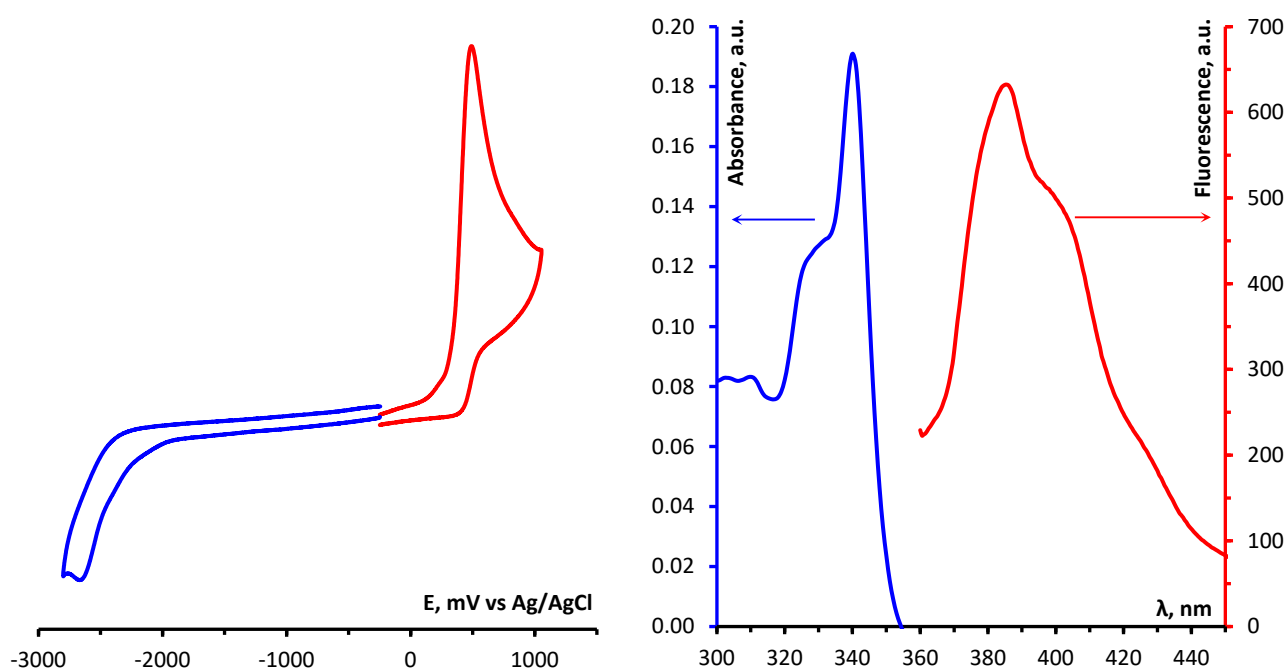

**Figure S19.** (left) CV curves of oxidation (red) and reduction (blue) of **2** ( $C = 3$  mM) in a 0.1 M  $\text{Bu}_4\text{NBF}_4/\text{DMF}$  supporting electrolyte on a glassy carbon disc electrode at a potential scan rate of  $100 \text{ mV s}^{-1}$ . (right) Absorbance and fluorescence spectra of **2** in DMF ( $C = 0.1$  mM).

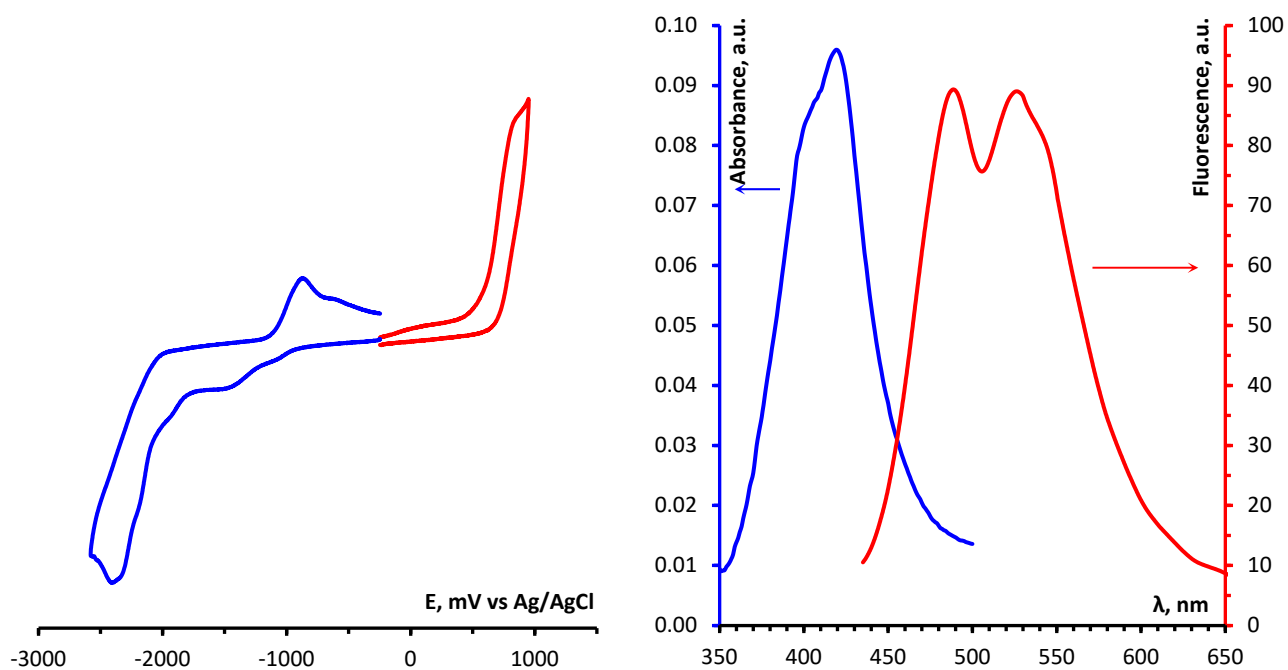

**Figure S20.** (left) CV curves of oxidation (red) and reduction (blue) of **3** ( $C = 3$  mM) in a 0.1 M  $\text{Bu}_4\text{NBF}_4/\text{DMF}$  supporting electrolyte on a glassy carbon disc electrode at a potential scan rate of  $100 \text{ mV s}^{-1}$ . (right) Absorbance and fluorescence spectra of **3** in DMF ( $C = 0.1$  mM).

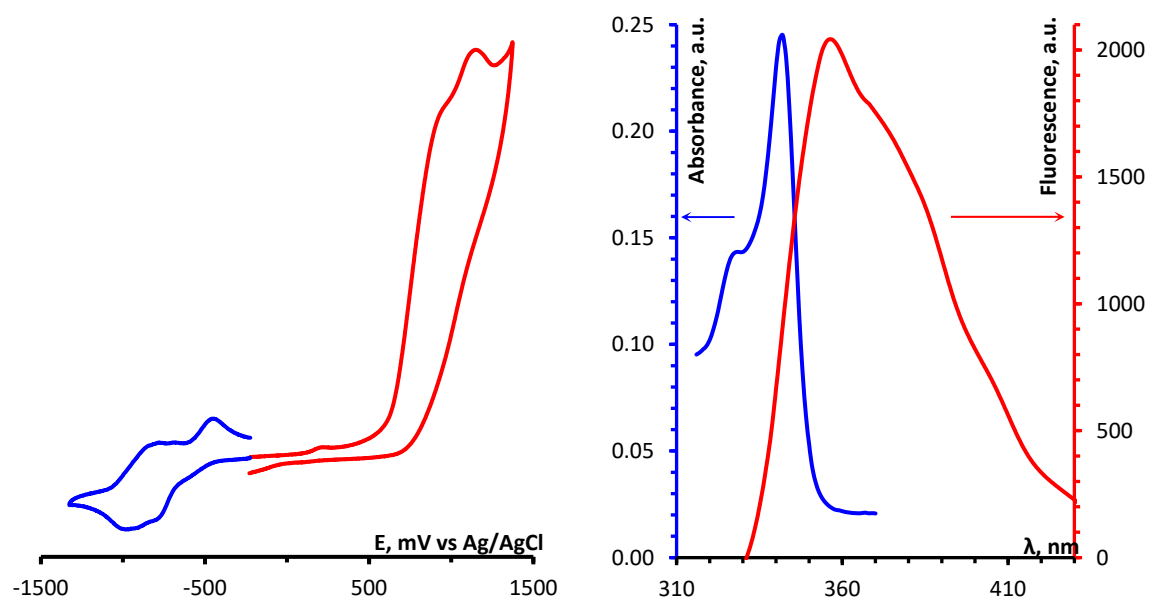

**Figure S21.** (left) CV curves of oxidation (red) and reduction (blue) of **5** ( $C = 3 \text{ mM}$ ) in a  $0.1 \text{ M Bu}_4\text{NBF}_4/\text{DMF}$  supporting electrolyte on a glassy carbon disc electrode at a potential scan rate of  $100 \text{ mV s}^{-1}$ . (right) Absorbance and fluorescence spectra of **5** in DMF.

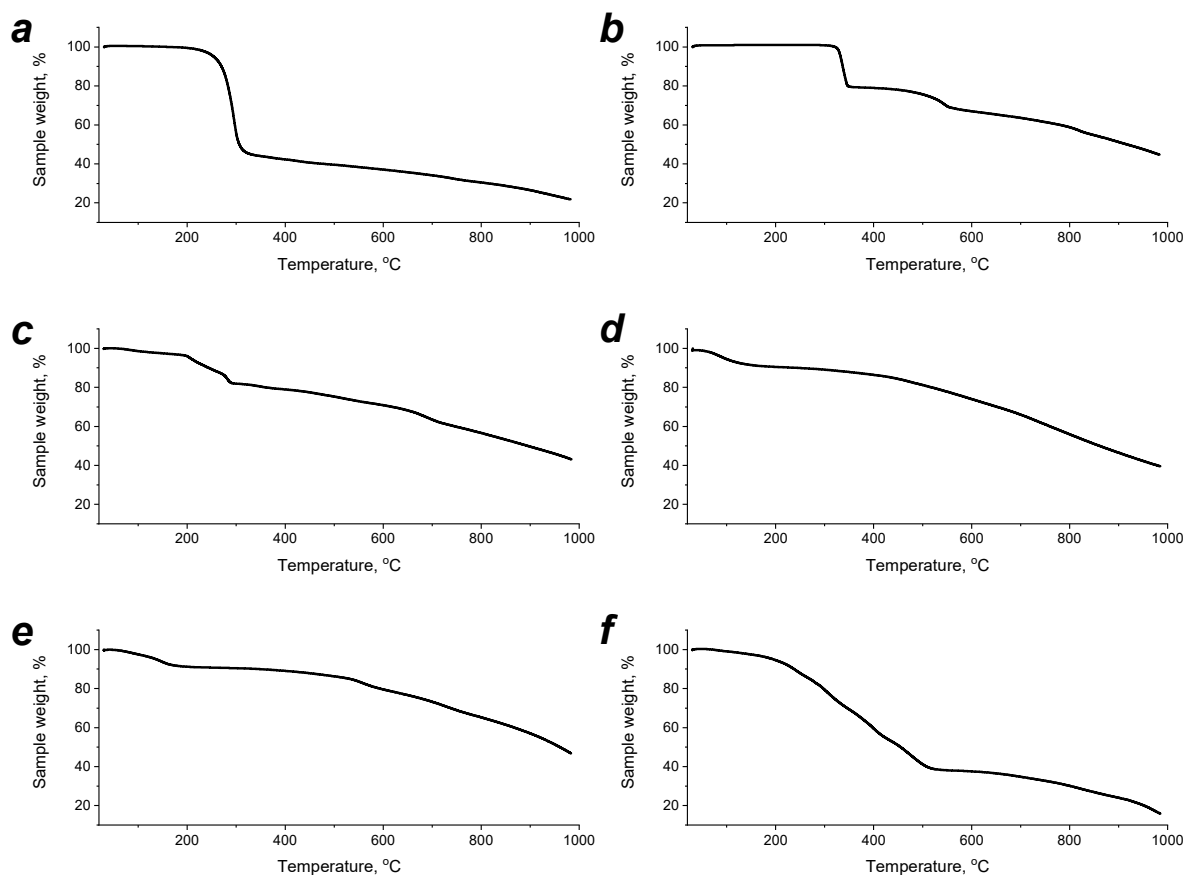

**Figure S22.** Thermal gravimetry profiles of compounds **1** (a), **2** (b), **3** (c), **4** (d), **5** (e) and **6** (f).

**Table S5.** Modification of surface properties of PC<sub>61</sub>BM by interlayers **1-6**

| Sample                        | Surface free energy, mN m <sup>-1</sup> | Dispersive part, mN m <sup>-1</sup> | Polar part, mN m <sup>-1</sup> | Average water contact angle, deg. | Average CH <sub>2</sub> I <sub>2</sub> contact angle, deg. |
|-------------------------------|-----------------------------------------|-------------------------------------|--------------------------------|-----------------------------------|------------------------------------------------------------|
| PC <sub>61</sub> BM/ <b>1</b> | 54.6±1.4                                | 48.3±0.7                            | 6.3±0.7                        | 67.4±1.8                          | 18.1±2.5                                                   |
| PC <sub>61</sub> BM/ <b>2</b> | 49.2±2.1                                | 47.1±1.8                            | 2.1±0.4                        | 80.6±1.1                          | 22.1±2.5                                                   |
| PC <sub>61</sub> BM/ <b>3</b> | 51.7±1.0                                | 46.9±0.4                            | 4.8±0.6                        | 71.9±1.5                          | 22.9±1.2                                                   |
| PC <sub>61</sub> BM/ <b>4</b> | 50.4±0.7                                | 46.4±0.2                            | 4.0±0.5                        | 74.6±1.3                          | 24.4±0.6                                                   |
| PC <sub>61</sub> BM/ <b>5</b> | 68.3±2.0                                | 47.7±0.5                            | 21.0±1.5                       | 38.2±2.9                          | 20.2±1.7                                                   |
| PC <sub>61</sub> BM/ <b>6</b> | 52.8±1.6                                | 47.7±1.1                            | 5.2±0.6                        | 70.6±1.4                          | 20.4±3.5                                                   |
| PC <sub>61</sub> BM           | 48.0±0.8                                | 47.7±0.7                            | 0.2±0.1                        | 91.1±1.1                          | 20.2±2.2                                                   |

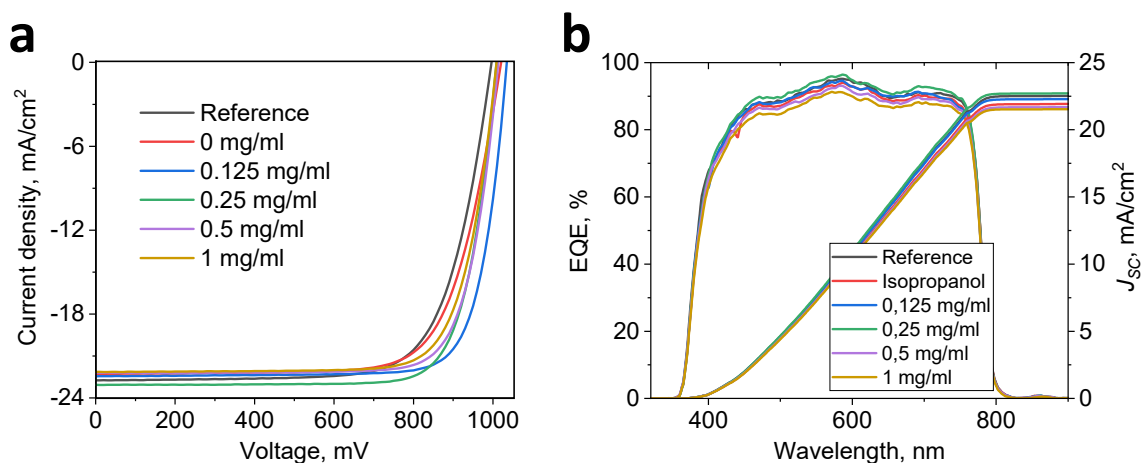

**Figure S23.** *J*-*V* curves (a) and EQE spectra (b) of perovskite solar cells with different concentrations of compound **1**

**Table S6.** Photovoltaic parameters of perovskite solar cells using compound **1** as interlayer\*

| Concentration of <b>1</b> , mg/ml | $V_{oc}$ , mV  | $J_{sc}$ , mA/cm <sup>2</sup> | FF, %     | PCE, %          |
|-----------------------------------|----------------|-------------------------------|-----------|-----------------|
| Reference                         | 1003±18 (996)  | 22.3±0.5 (22.7)               | 72±3 (73) | 15.5±1.0 (16.5) |
| 0                                 | 999±21 (1020)  | 22.5±0.4 (22.1)               | 75±2 (74) | 16.0±0.7 (16.7) |
| 0.125                             | 1019±28 (1035) | 22.5±0.5 (22.5)               | 76±4 (80) | 17.6±1.0 (18.6) |
| 0.25                              | 1002±19 (1009) | 22.5±0.6 (23.0)               | 79±1 (79) | 18.0±0.3 (18.3) |
| 0.5                               | 1014±11 (1014) | 20.6±0.3 (22.2)               | 78±2 (79) | 17.0±0.8 (17.8) |
| 1                                 | 998±20 (1008)  | 21.3±0.8 (22.0)               | 76±3 (78) | 17.0±0.3 (17.3) |

\* - Average parameters for a batch of 16 cells are given, while the champion cell characteristics are presented in brackets.

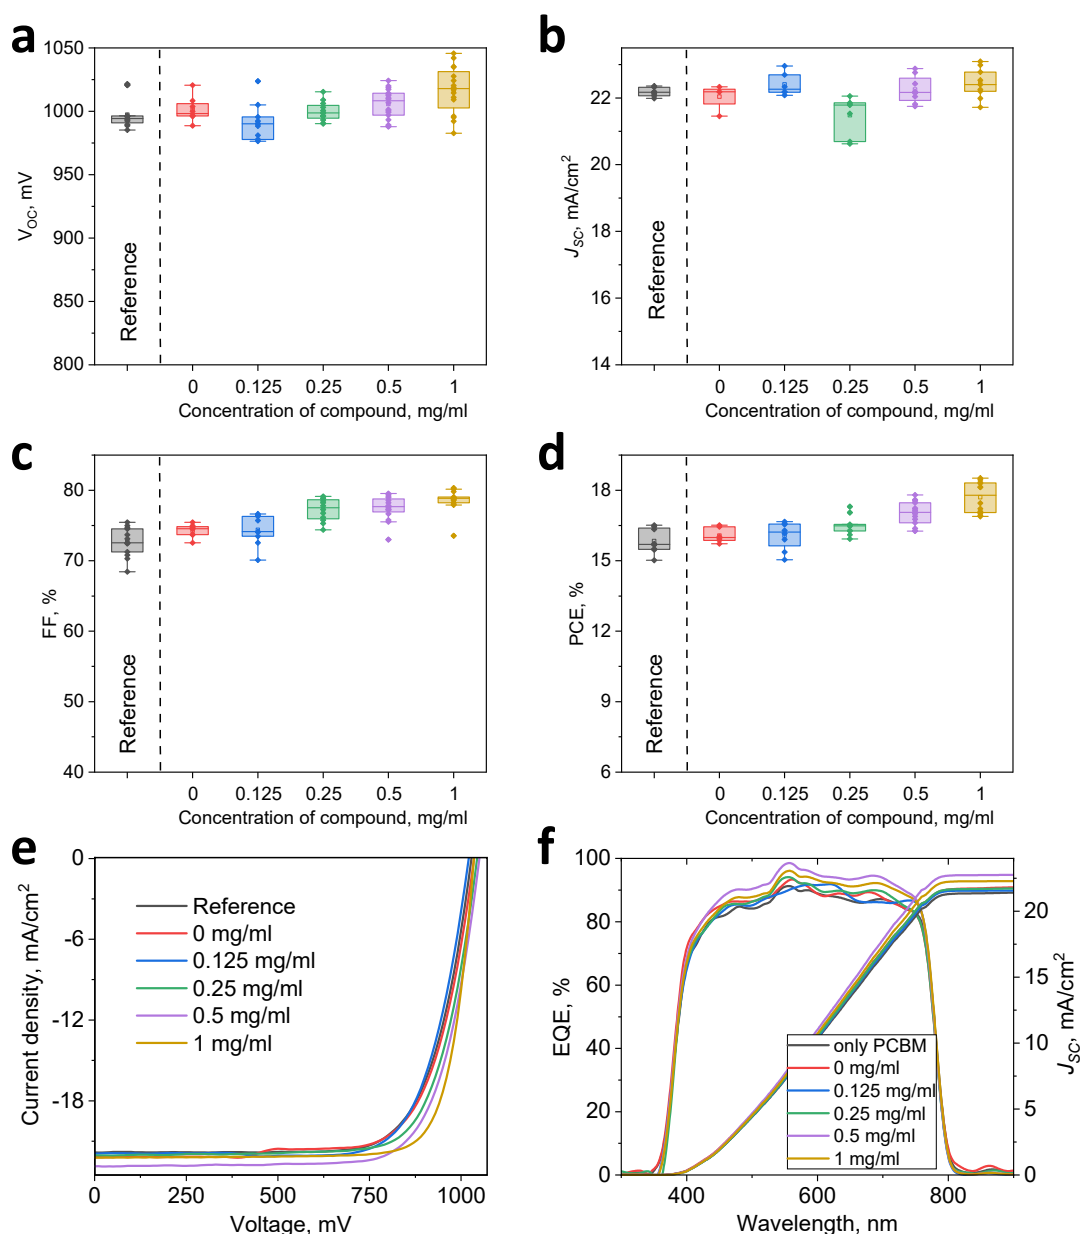

**Figure S24.**  $V_{OC}$  (a),  $J_{SC}$  (b), FF (c) and PCE (d) of PSCs as a function of concentration of **2**. J-V curves (e) and EQE (f) of the best devices

**Table S7.** Photovoltaic parameters of best solar cells with using of **2** as interlayer

| Concentration of <b>2</b> , mg/ml | $V_{OC}$ , mV  | $J_{SC}$ , mA/cm <sup>2</sup> | FF, %     | PCE, %          |
|-----------------------------------|----------------|-------------------------------|-----------|-----------------|
| Reference                         | 1002±29 (1027) | 22.0±0.4 (21.7)               | 73±3 (74) | 16.0±0.5 (16.5) |
| 0                                 | 997±11 (1035)  | 21.3±1.0 (22.2)               | 73±1 (72) | 16.3±0.3 (16.5) |
| 0.125                             | 985±10 (1021)  | 22.2±0.8 (22.0)               | 74±3 (74) | 16.2±0.5 (16.6) |
| 0.25                              | 1007±9 (1044)  | 21.5±0.6 (22.1)               | 77±2 (75) | 16.7±0.6 (17.3) |
| 0.5                               | 1037±17 (1050) | 22.4±0.5 (22.9)               | 77±3 (74) | 17.5±0.4 (17.8) |
| 1                                 | 1033±12 (1040) | 22.5±0.5 (22.2)               | 77±1 (80) | 17.9±0.6 (18.5) |

\* - Average parameters for a batch of 16 cells are given, while the champion cell characteristics are presented in brackets.

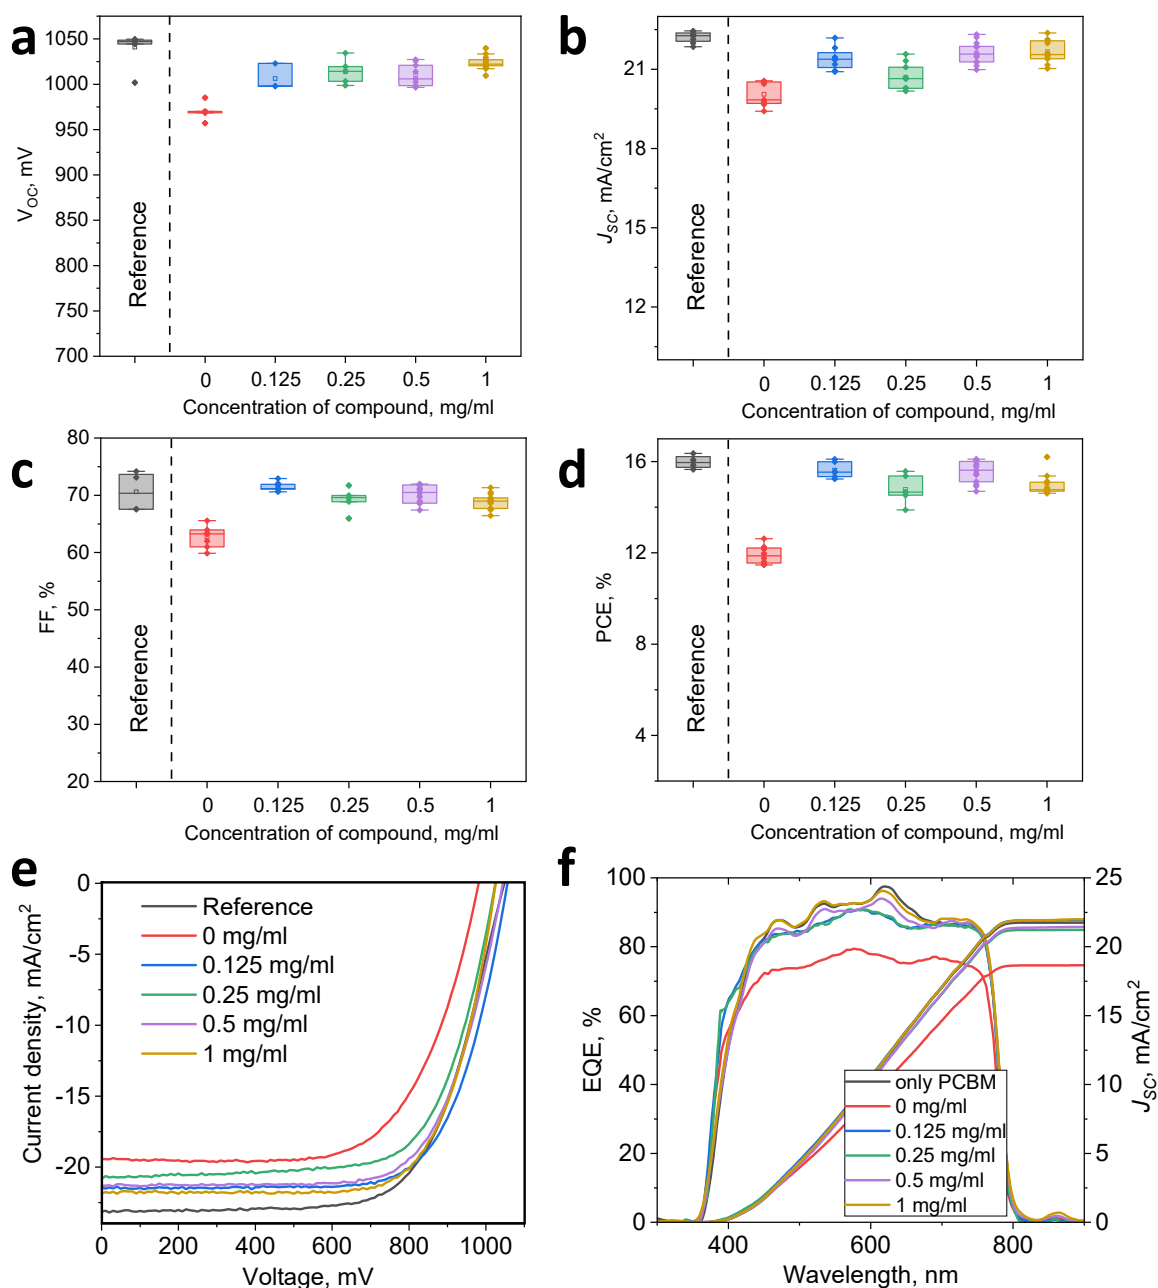

**Figure S25.**  $V_{OC}$  (a),  $J_{SC}$  (b), FF (c) and PCE (d) of PSCs as a function of concentration of **3**, J-V curves (e) and EQE (f) of the best devices

**Table S8.** Photovoltaic parameters of best solar cells with using of **3** as interlayer

| Concentration of <b>3</b> , mg/ml | $V_{OC}$ , mV  | $J_{SC}$ , mA/cm <sup>2</sup> | FF, %     | PCE, %          |
|-----------------------------------|----------------|-------------------------------|-----------|-----------------|
| Reference                         | 1034±17 (1045) | 22.6±0.5 (23.1)               | 70±3 (68) | 15.8±0.6 (16.4) |
| 0                                 | 973±12 (981)   | 20.0±0.6 (19.4)               | 66±2 (66) | 12.1±0.5 (12.6) |
| 0.125                             | 993±10 (1056)  | 21.9±0.3 (21.5)               | 71±2 (71) | 15.5±0.6 (16.1) |
| 0.25                              | 1032±12 (1044) | 21.0±0.6 (21.3)               | 69±3 (70) | 15.0±0.6 (15.6) |
| 0.5                               | 1013±14 (1024) | 22.0±0.3 (21.9)               | 69±3 (72) | 15.8±0.3 (16.1) |
| 1                                 | 1023±16 (1022) | 22.0±0.3 (21.5)               | 72±2 (74) | 15.8±0.5 (16.3) |

\* - Average parameters for a batch of 16 cells are given, while the champion cell characteristics are presented in brackets.



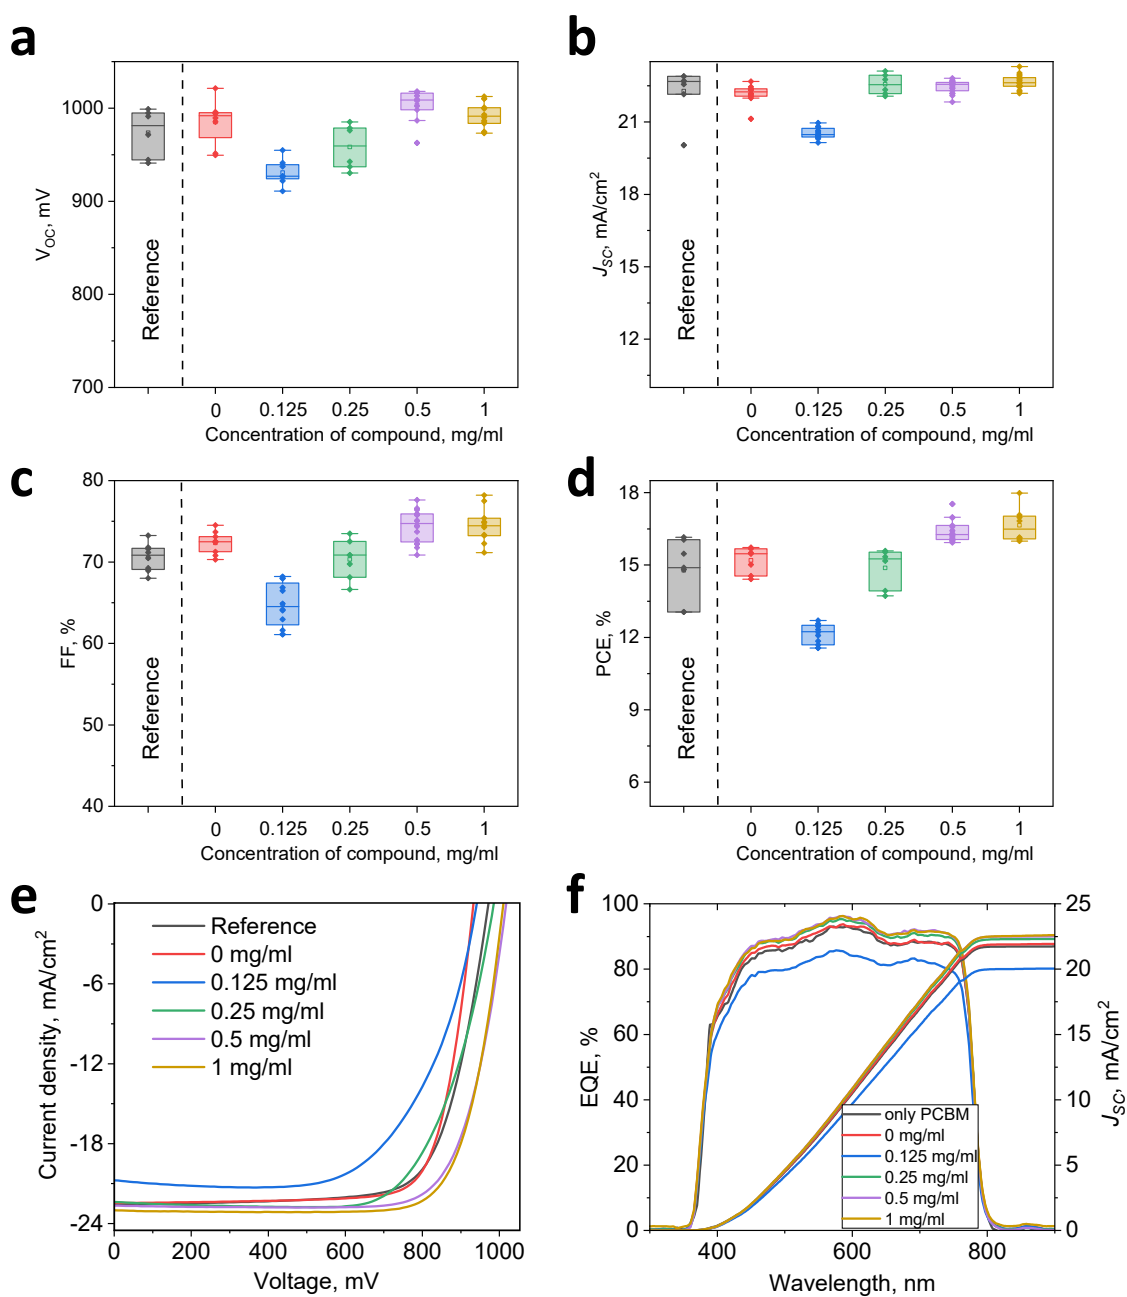

**Figure S26.**  $V_{OC}$  (a),  $J_{SC}$  (b), FF (c) and PCE (d) of PSCs as a function of concentration of **4**, J-V curves (e) and EQE (f) of the best devices

**Table S9.** Photovoltaic parameters of best solar cells with using of **4** as interlayer

| Concentration of <b>4</b> , mg/ml | $V_{OC}$ , mV | $J_{SC}$ , mA/cm <sup>2</sup> | FF, %     | PCE, %          |
|-----------------------------------|---------------|-------------------------------|-----------|-----------------|
| Reference                         | 968±31 (972)  | 22.3±0.6 (22.7)               | 70±3 (73) | 14.1±2.0 (16.1) |
| 0                                 | 969±43 (930)  | 22.2±0.5 (22.3)               | 73±5 (78) | 14.8±0.9 (16.2) |
| 0.125                             | 920±35 (941)  | 20.4±0.6 (20.8)               | 64±4 (65) | 12.0±0.7 (12.7) |
| 0.25                              | 948±37 (985)  | 22.4±0.7 (22.3)               | 69±5 (71) | 14.2±1.4 (15.6) |
| 0.5                               | 982±36 (1017) | 22.5±0.3 (22.7)               | 74±4 (76) | 16.1±1.5 (17.5) |
| 1                                 | 999±23 (1015) | 22.6±0.7 (23.0)               | 73±5 (77) | 16.2±1.8 (18.0) |

\* - Average parameters for a batch of 16 cells are given, while the champion cell characteristics are presented in brackets.

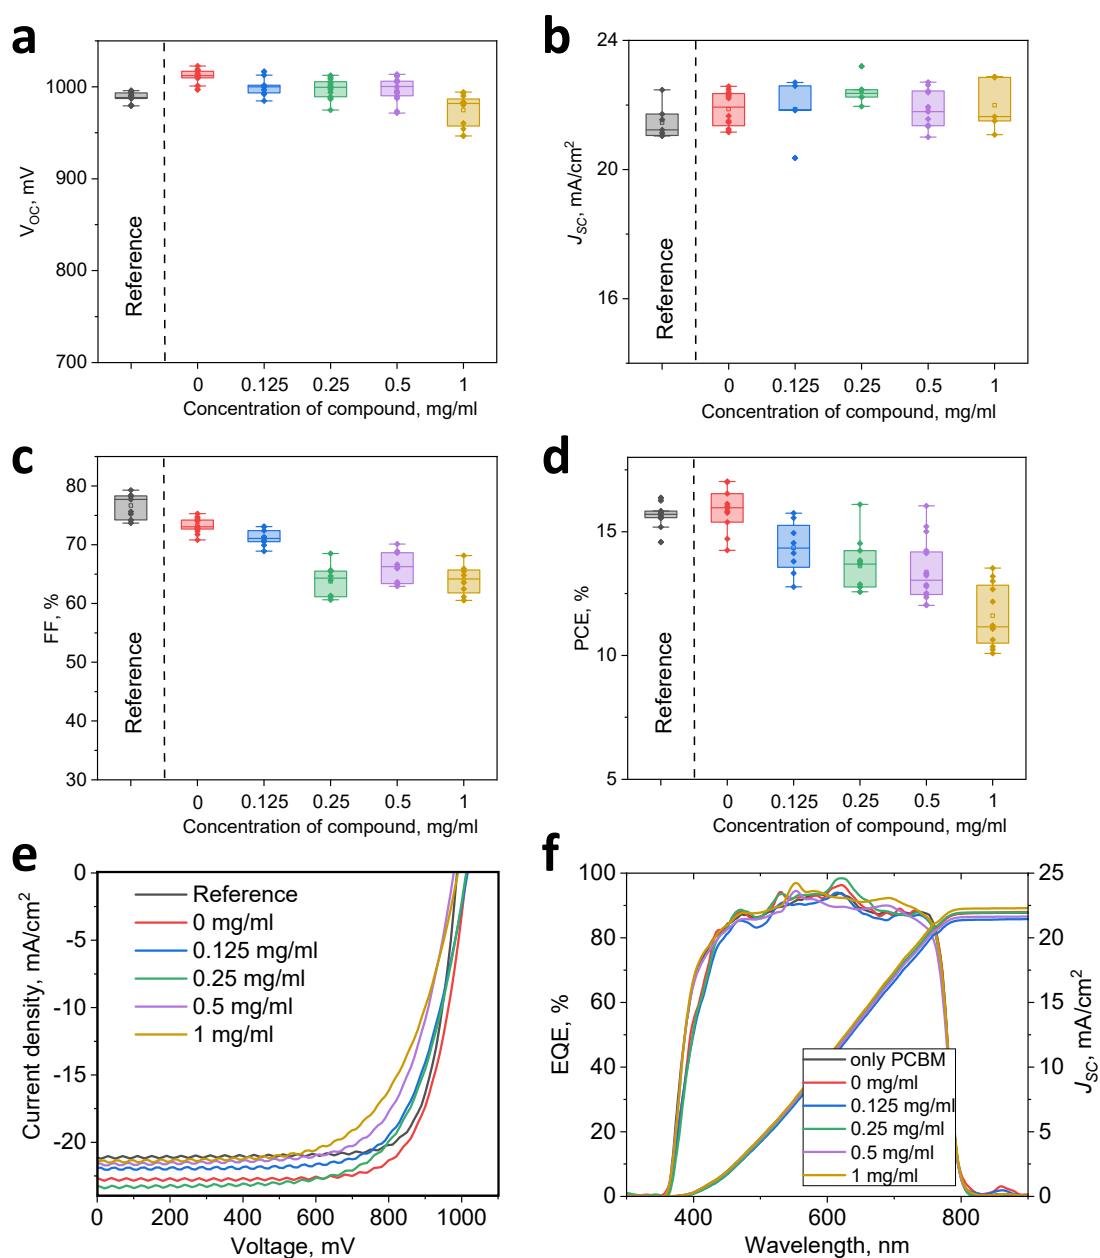

**Figure S27.**  $V_{OC}$  (a),  $J_{SC}$  (b), FF (c) and PCE (d) of PSCs as a function of concentration of **5**, J-V curves (e) and EQE (f) of the best devices

**Table S10.** Photovoltaic parameters of best solar cells with using of **5** as interlayer

| Concentration of <b>5</b> , mg/ml | $V_{OC}$ , mV  | $J_{SC}$ , mA/cm <sup>2</sup> | FF, %     | PCE, %          |
|-----------------------------------|----------------|-------------------------------|-----------|-----------------|
| Reference                         | 988±8 (989)    | 21.3±1.2 (21.2)               | 76±3 (78) | 15.6±0.8 (16.4) |
| 0                                 | 1012±11 (1014) | 21.9±0.8 (22.7)               | 73±2 (75) | 16.0±1.3 (17.3) |
| 0.125                             | 1004±13 (1016) | 21.9±0.8 (21.8)               | 70±3 (71) | 14.6±1.1 (15.7) |
| 0.25                              | 998±14 (1011)  | 21.9±1.3 (23.1)               | 64±5 (69) | 14.6±1.5 (16.1) |
| 0.5                               | 1004±10 (978)  | 22.0±0.7 (21.6)               | 66±4 (69) | 12.6±2.0 (14.6) |
| 1                                 | 985±10 (989)   | 22.3±1.0 (21.4)               | 65±3 (64) | 12.1±1.4 (13.5) |

\* - Average parameters for a batch of 16 cells are given, while the champion cell characteristics are presented in brackets.

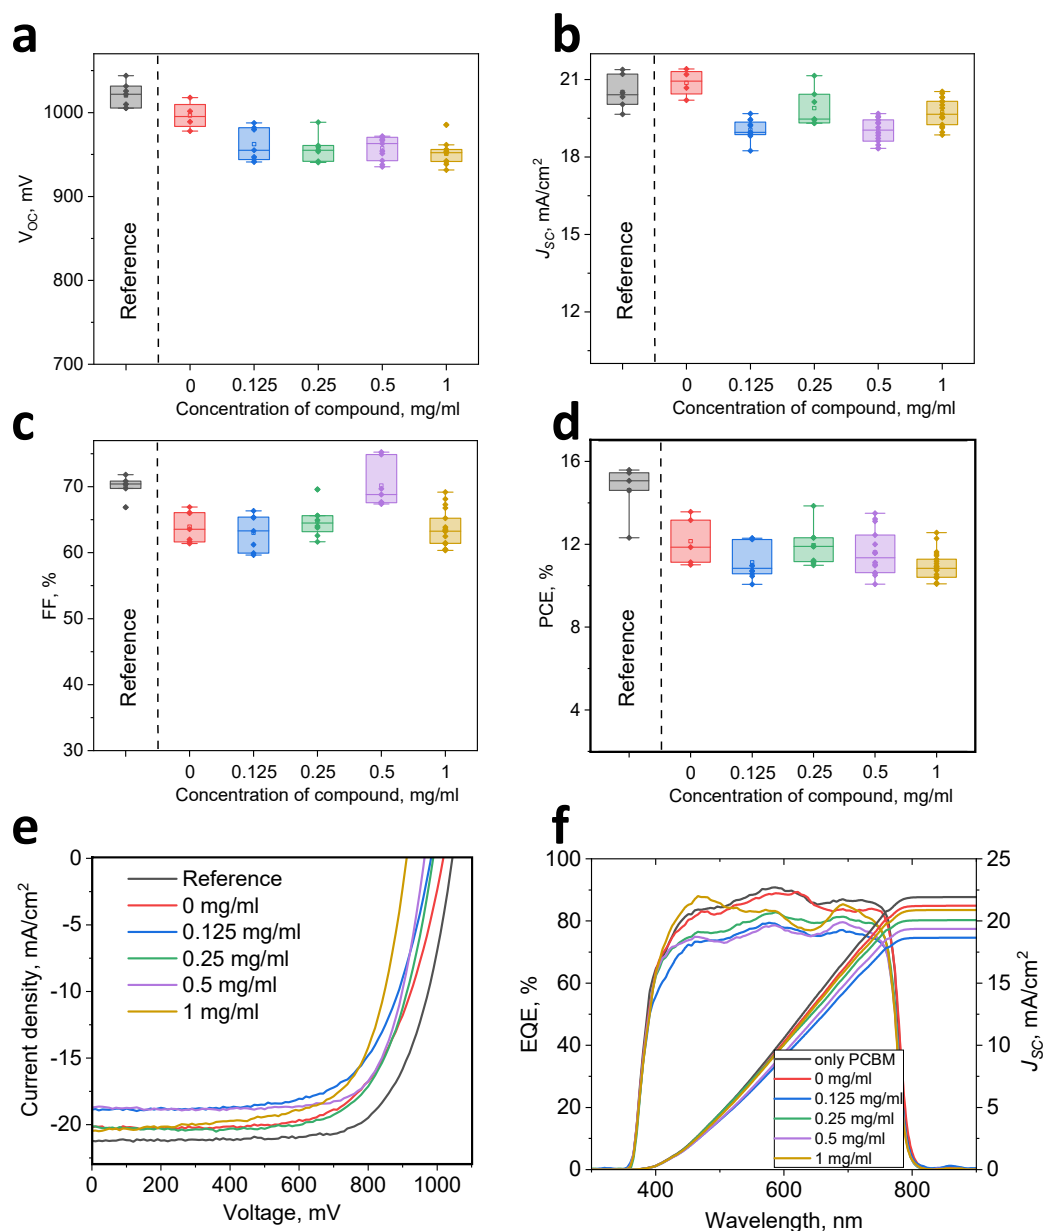

**Figure S28.**  $V_{OC}$  (a),  $J_{SC}$  (b), FF (c) and PCE (d) of PSCs as a function of concentration of **6**, J-V curves (e) and EQE (f) of the best devices

**Table S11.** Photovoltaic parameters of best solar cells with using of **6** as interlayer.

| Concentration of <b>6</b> , mg/ml | $V_{OC}$ , mV  | $J_{SC}$ , mA/cm <sup>2</sup> | FF, %     | PCE, %          |
|-----------------------------------|----------------|-------------------------------|-----------|-----------------|
| Reference                         | 1026±17 (1042) | 20.4±1.0 (21.1)               | 69±3 (71) | 13.6±2.0 (15.6) |
| 0                                 | 1002±16 (1018) | 19.7±1.7 (20.2)               | 64±3 (66) | 12.2±1.4 (13.6) |
| 0.125                             | 970±18 (980)   | 19.0±0.7 (19.3)               | 61±4 (65) | 10.7±1.6 (12.3) |
| 0.25                              | 972±16 (988)   | 20.3±0.9 (20.1)               | 66±4 (70) | 12.1±1.7 (13.9) |
| 0.5                               | 959±14 (963)   | 18.7±1.0 (18.7)               | 72±4 (75) | 11.8±1.7 (13.5) |
| 1                                 | 966±20 (912)   | 20.1±1.0 (20.6)               | 65±4 (67) | 11.2±1.5 (12.6) |

\* - Average parameters for a batch of 16 cells are given, while the champion cell characteristics are presented in brackets.

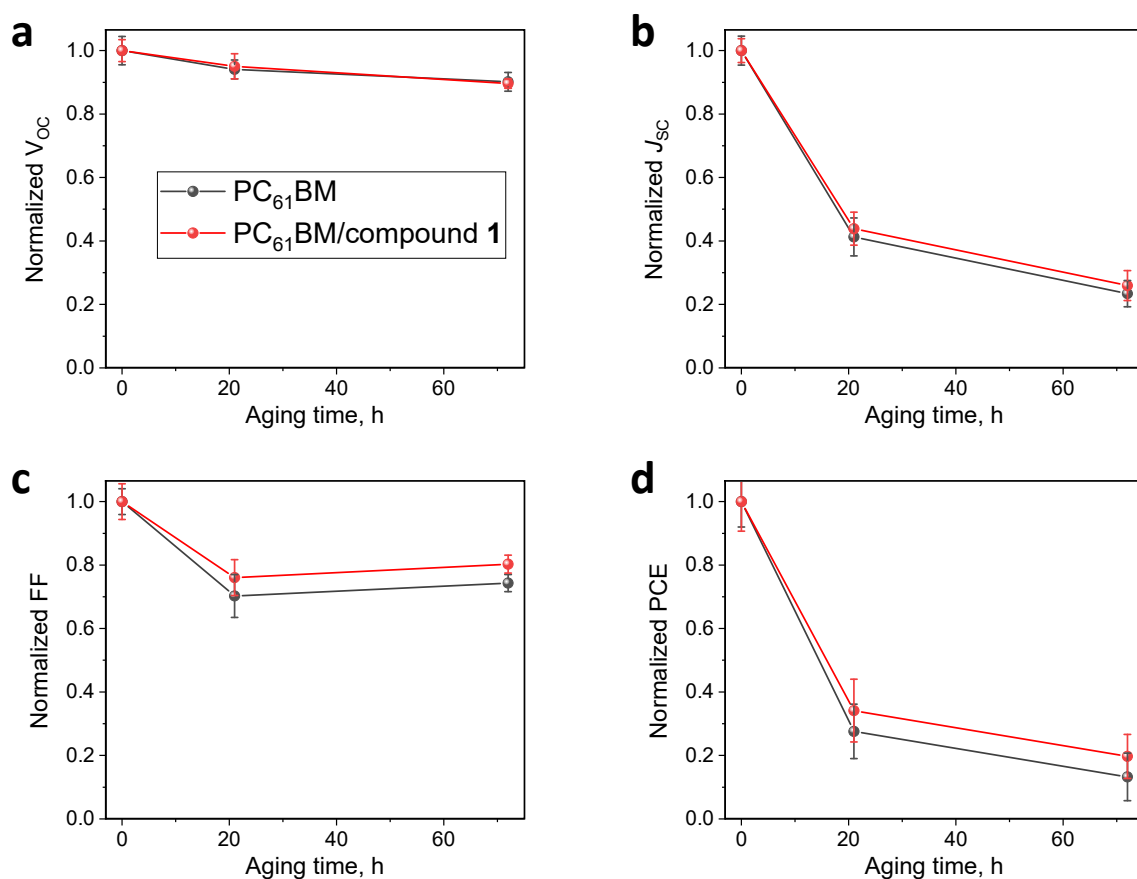

**Figure S29.** The evolution of the normalized open-circuit voltage (a), short-circuit current (b), fill factor (c) and power conversion efficiency (d) of perovskite solar cells using bare  $\text{PC}_{61}\text{BM}$  and its combination with compound 1 as ETL materials.

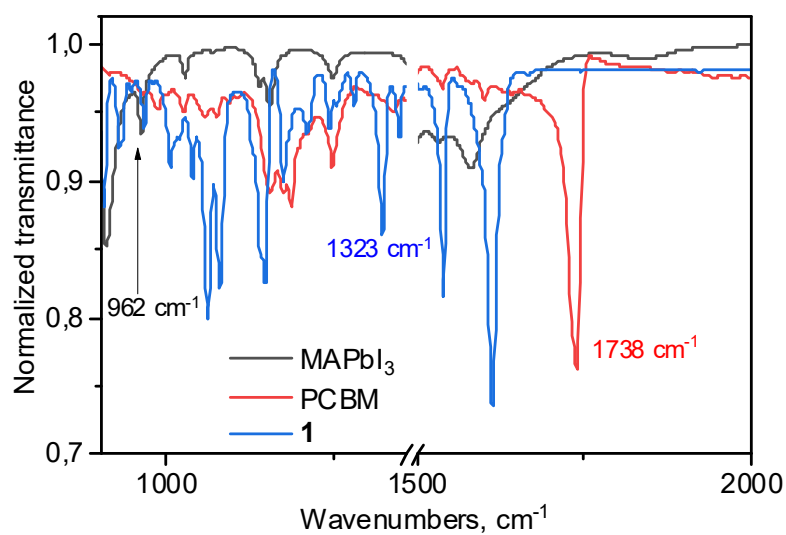

**Figure S30.** ATR FTIR spectra of  $\text{MAPbI}_3$ ,  $\text{PC}_{61}\text{BM}$ , and 1.

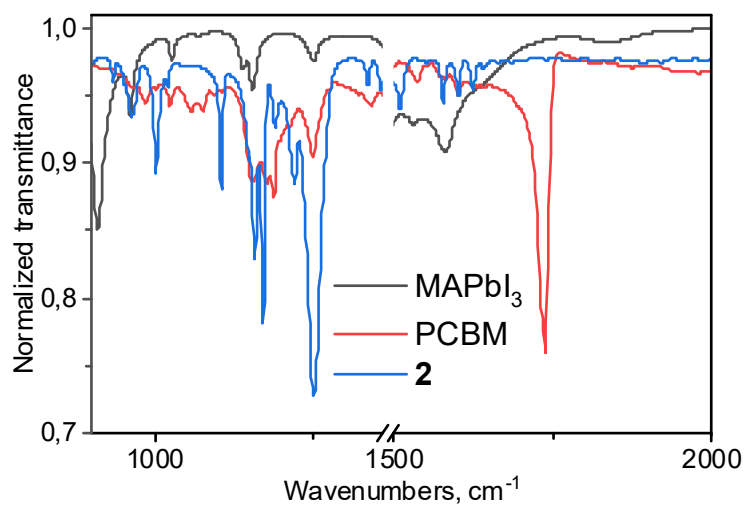

**Figure S31.** ATR FTIR spectra of MAPbI<sub>3</sub>, PC<sub>61</sub>BM, and **2**.

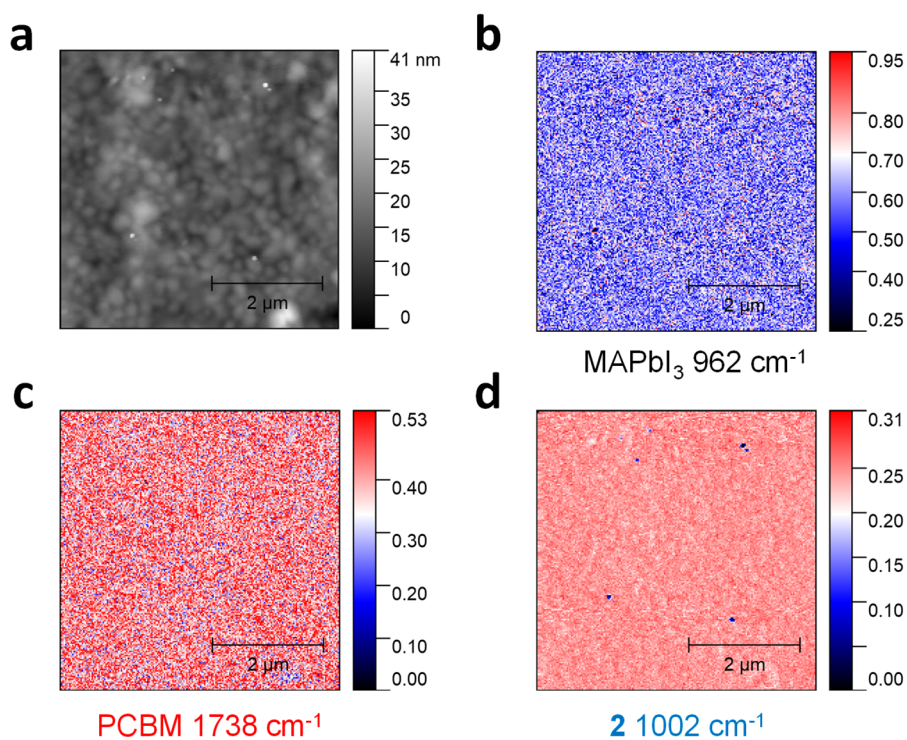

**Figure S32.** AFM topography of ITO/PTA/MAPbI<sub>3</sub>/PC<sub>61</sub>BM/**2** film (a); mappings of ITO/PTA/MAPbI<sub>3</sub>/PC<sub>61</sub>BM/**2** topography at frequencies of 962 cm<sup>-1</sup> (b), 1738 cm<sup>-1</sup> (c), and 1002 cm<sup>-1</sup> (d), which are characteristic for MAPbI<sub>3</sub>, PC<sub>61</sub>BM, and **2**, respectively.

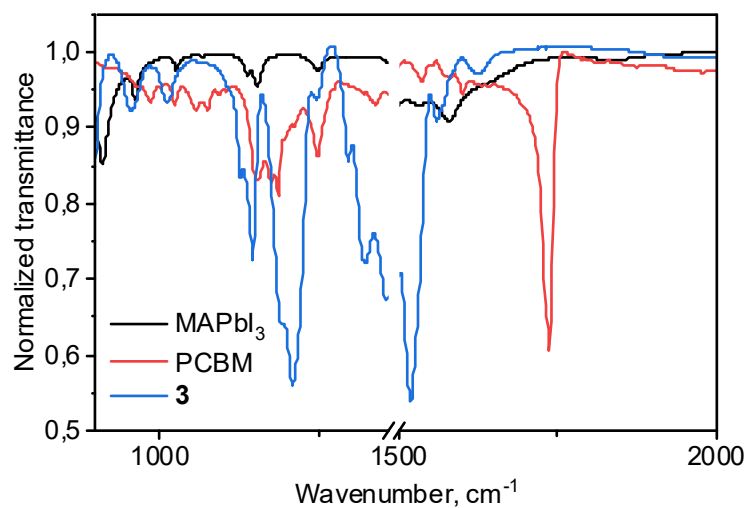

**Figure S33.** ATR FTIR spectra of MAPbI<sub>3</sub>, PC<sub>61</sub>BM, and **3**.

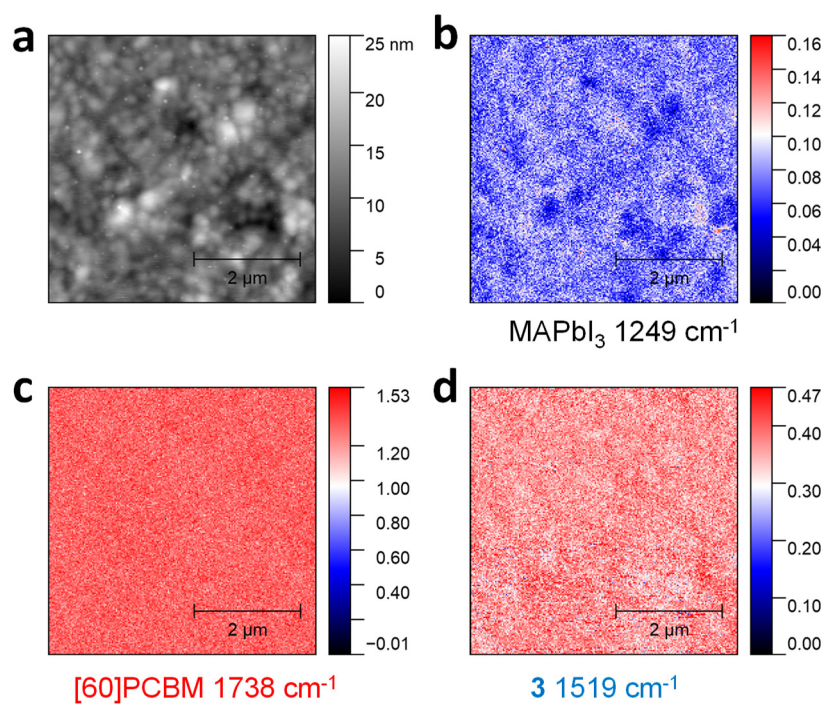

**Figure S34.** AFM topography of ITO/PTA/MAPbI<sub>3</sub>/PC<sub>61</sub>BM/**3** film (a); mappings of ITO/PTA/MAPbI<sub>3</sub>/PC<sub>61</sub>BM/**3** topography at frequencies of 1249 cm<sup>-1</sup> (b), 1738 cm<sup>-1</sup> (c), and 1519 cm<sup>-1</sup> (d), which are characteristic for MAPbI<sub>3</sub>, PC<sub>61</sub>BM, and **3**, respectively.

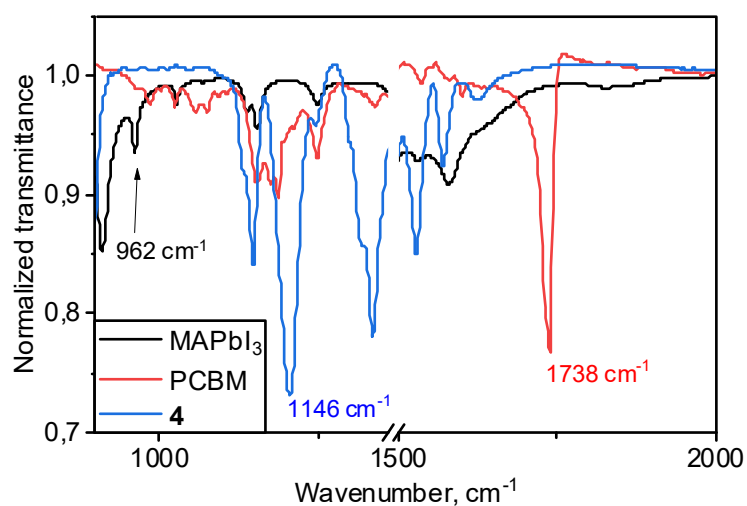

**Figure S35.** ATR FTIR spectra of MAPbI<sub>3</sub>, PC<sub>61</sub>BM, and **4**.

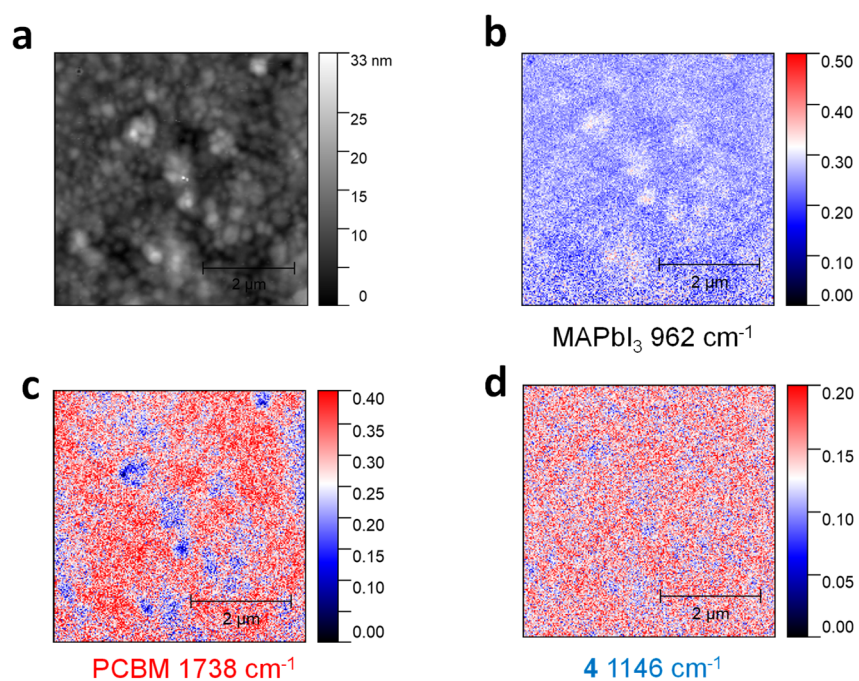

**Figure S36.** AFM topography of ITO/PTA/MAPbI<sub>3</sub>/PC<sub>61</sub>BM/**4** film (a); mappings of ITO/PTA/MAPbI<sub>3</sub>/PC<sub>61</sub>BM/**4** topography at frequencies of 962 cm<sup>-1</sup> (b), 1738 cm<sup>-1</sup> (c), and 1146 cm<sup>-1</sup> (d), which are characteristic for **4**, PC<sub>61</sub>BM, and MAPbI<sub>3</sub>, respectively.



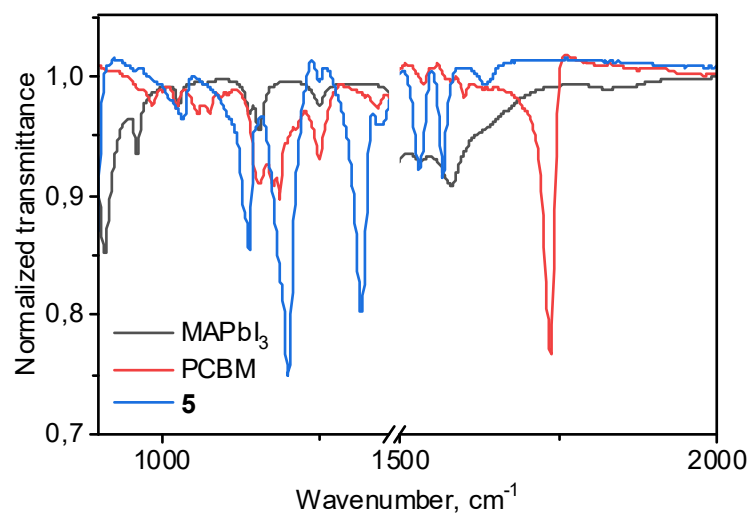

**Figure S37.** ATR FTIR spectra of MAPbI<sub>3</sub>, PC<sub>61</sub>BM, and **5**.

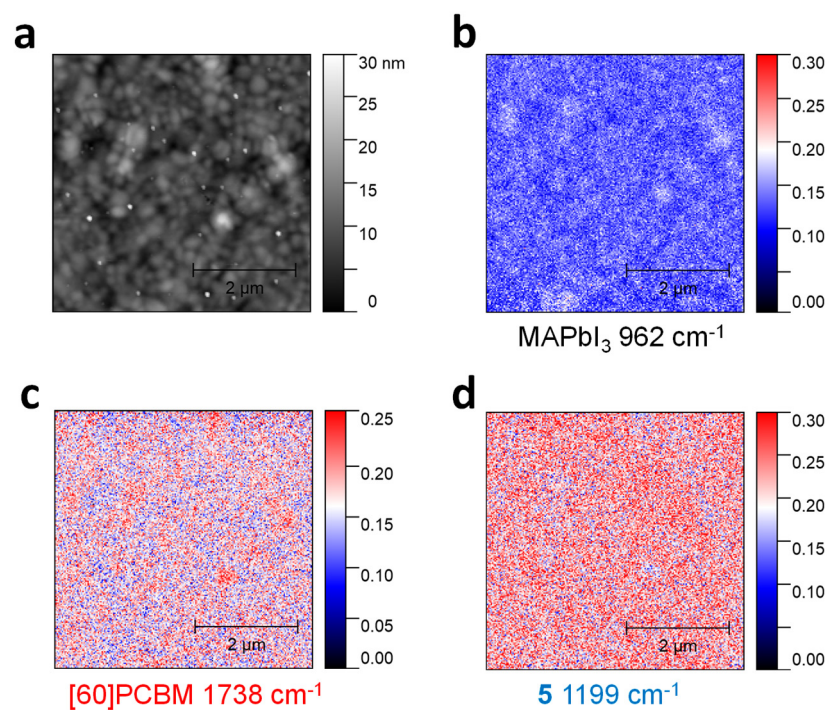

**Figure S38.** AFM topography of ITO/PTA/MAPbI<sub>3</sub>/PC<sub>61</sub>BM/**5** film (a); mappings of ITO/PTA/MAPbI<sub>3</sub>/PC<sub>61</sub>BM/**5** topography at frequencies of 962 cm<sup>-1</sup> (b), 1738 cm<sup>-1</sup> (c), and 1199 cm<sup>-1</sup> (d), which are characteristic for **5**, PC<sub>61</sub>BM, and MAPbI<sub>3</sub>, respectively.



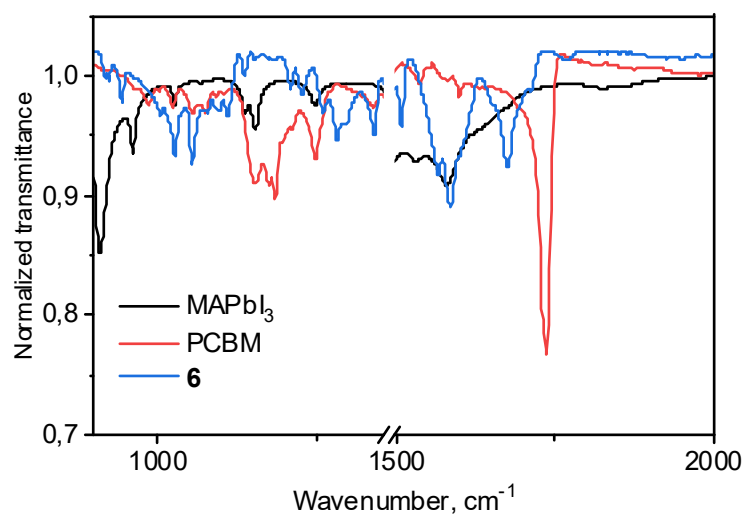

**Figure S39.** ATR FTIR spectra of MAPbI<sub>3</sub>, PC<sub>61</sub>BM, and **6**.

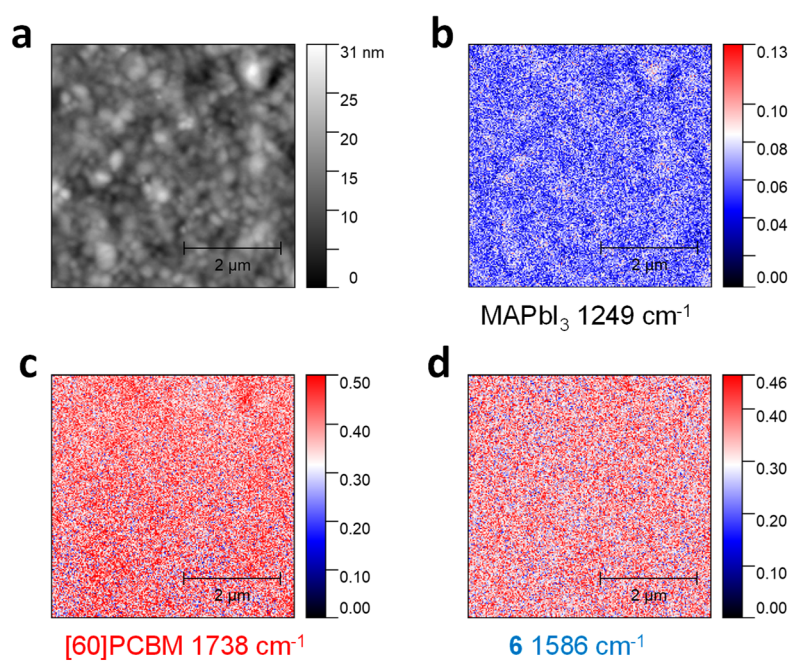

**Figure S40.** AFM topography of ITO/PTA/MAPbI<sub>3</sub>/PC<sub>61</sub>BM/**6** film (a); mappings of ITO/PTA/MAPbI<sub>3</sub>/PC<sub>61</sub>BM/**6** topography at frequencies of 962 cm<sup>-1</sup> (b), 1738 cm<sup>-1</sup> (c), and 1586 cm<sup>-1</sup> (d), which are characteristic for **6**, PC<sub>61</sub>BM, and MAPbI<sub>3</sub>, respectively.
